# Supplementary material for: Synthesis of 5‐Alkyl‐ and 5‐Phenylamino‐Substituted Azothiazole Dyes with Solvatochromic and DNA‐Binding Properties
Source: PubMed Central journal article supplement (PMC6973281; doi:10.1002/chem.201903657), 2019-11-08
Supplement: CHEM-25-16088-s001.pdf [file CHEM-25-16088-s001.pdf]

# CHEMISTRY

## A **European** Journal

### Supporting Information

#### **Synthesis of 5-Alkyl- and 5-Phenylamino-Substituted Azothiazole Dyes with Solvatochromic and DNA-Binding Properties**

Phil M. Pithan, Christopher Kuhlmann, Carsten Engelhard, and Heiko Ihmels\*<sup>[a]</sup>

chem\_201903657\_sm\_miscellaneous\_information.pdf

## Table of contents

|          |                                                                                            |           |
|----------|--------------------------------------------------------------------------------------------|-----------|
| <b>1</b> | <b>Experimental Section</b> .....                                                          | <b>2</b>  |
| 1.1      | Methods .....                                                                              | 2         |
| 1.1.1    | Determination of fluorescence quantum yields of azothiazole <b>8b</b> .....                | 2         |
| 1.2      | Synthesis .....                                                                            | 2         |
| 1.2.1    | Synthesis of diethyl 2,2'-(diazene-1,2-diyl)-(E)-bis(thiazole-4-carboxylate) ( <b>2g</b> ) | 2         |
| 1.2.2    | Synthesis of the azothiazole derivatives <b>7a–f</b> and <b>8a–f</b> .....                 | 3         |
| <b>2</b> | <b>Additional spectroscopic data</b> .....                                                 | <b>11</b> |
| 2.1      | Absorption and emission properties .....                                                   | 11        |
| 2.2      | DNA-binding properties .....                                                               | 15        |
| <b>3</b> | <b><sup>1</sup>H- and <sup>13</sup>C-NMR spectra</b> .....                                 | <b>17</b> |
| <b>4</b> | <b>References</b> .....                                                                    | <b>30</b> |

# 1 Experimental Section

## 1.1 Methods

Physical-chemical and essential preparative procedures were performed at least twice to check reproducibility.

### 1.1.1 Determination of fluorescence quantum yields of azothiazole **8b**

The relative fluorescence quantum yields of the azothiazole derivative **8b** were determined under identical conditions, *i.e.* the same cuvettes were used and the measurements were performed at a constant temperature with the same settings on the spectrometer (detection wavelength, excitation wavelength, detector voltage, slit bandwidths, collection rate). Cresyl violet ( $\Phi_{fl} = 0.54$  in MeOH)<sup>[1]</sup> was used as standard. The emission spectra were collected from diluted solutions with Abs. = 0.10 at the excitation wavelength  $\lambda_{ex} = 515$  nm. After integration of the fluorescence band, the relative fluorescence quantum yields were calculated according to Eq. 1.<sup>[2]</sup>

$$\phi_F = \frac{J_x \cdot (1 - T_S)}{J_S \cdot (1 - T_x)} \cdot \frac{n_x^2}{n_S^2} \cdot \phi_{F,S} \quad (\text{Eq. 1})$$

The subscripts “x” and “s” refer to the substance under investigation and a reference compound, respectively;  $J = \int I_F(\lambda) d\lambda$  is the emission integral over the area of interest;  $T$  is the optical transmittance of the sample solution at the excitation wavelength,  $\lambda_{ex}$ ;  $n$  is the refractive index of the sample or standard solution.

## 1.2 Synthesis

### 1.2.1 Synthesis of diethyl 2,2'-(diazene-1,2-diyl)-(E)-bis(thiazole-4-carboxylate) (**2g**)

The known azothiazole **2g** was synthesized according to the published procedure (Scheme S1).<sup>[3]</sup>

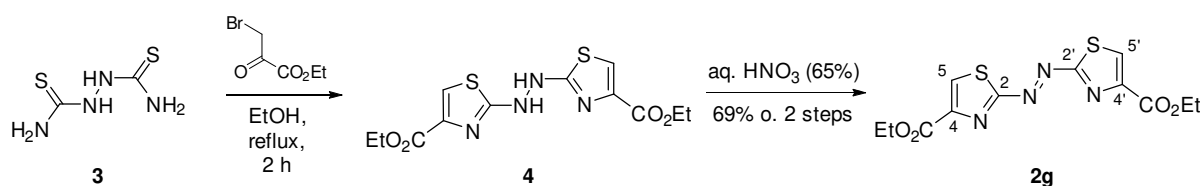

**Scheme S1.** Synthesis of azothiazole **2g**.<sup>[3]</sup>

Diethyl 2,2'-(hydrazine-1,2-diyl)-bis(thiazole-4-carboxylate) (**4**)

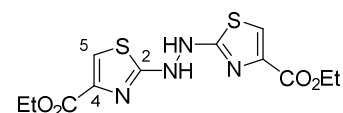

Under an argon atmosphere a solution of 2,5-dithiobiurea (**3**) (3.00 g, 20.0 mmol) and ethyl 3-bromopyruvate (7.80 g, 40.0 mmol, 6.69 mL, tech. 75%) in ketone-free EtOH (30 mL) was stirred for 2 h under reflux. The reaction mixture was cooled to 0 °C. The precipitate was filtered, washed with ice-cold MeOH (5 x 10 mL) and Et<sub>2</sub>O (2 x 30 mL). The product **4** was obtained as light ochre-colored solid (5.30 g) and used without purification. A pure, white sample of the hydrazine **4** was obtained by crystallization from the mother liquor and washing with cold EtOH; mp > 220 °C (dec.) (lit.: 227–228 °C<sup>[3]</sup>). – <sup>1</sup>H-NMR (400 MHz, DMSO-*d*<sub>6</sub>): δ = 1.27 (t, <sup>3</sup>*J* = 7 Hz, 6 H, 4-CO<sub>2</sub>CH<sub>2</sub>CH<sub>3</sub>), 4.23 (q, <sup>3</sup>*J* = 7 Hz, 4 H, 4-CO<sub>2</sub>CH<sub>2</sub>CH<sub>3</sub>), 7.75 (s, 2 H, 5-H), 10.26 (s, 2 H, NH). – <sup>13</sup>C-NMR (100 MHz, DMSO-*d*<sub>6</sub>): δ = 14.2 (4-CO<sub>2</sub>CH<sub>2</sub>CH<sub>3</sub>), 60.4 (4-CO<sub>2</sub>CH<sub>2</sub>CH<sub>3</sub>), 119.3 (C5), 143.1 (C4), 160.8 (4-CO<sub>2</sub>CH<sub>2</sub>CH<sub>3</sub>), 172.4 (C2).

Diethyl 2,2'-(diazene-1,2-diyl)-(*E*)-bis(thiazole-4-carboxylate) (**2g**)

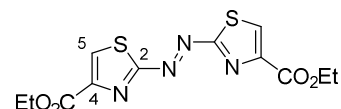

The hydrazine **4** (5.30 g, 15.5 mmol) was suspended in nitric acid (*w* = 65%, 6.0 mL), stirred for 5 min and left standing for 16 h (CAUTION: evolution of nitrous gases). After the addition of H<sub>2</sub>O (240 mL) the product **2g** was filtered, thoroughly washed with H<sub>2</sub>O, dried in a vacuum desiccator over CaCl<sub>2</sub> and obtained as ochre-colored, amorphous solid (4.73 g, 13.8 mmol, 69% o. 2 steps); mp > 245 °C (dec.) (lit.: 244–245 °C<sup>[3]</sup>). – <sup>1</sup>H-NMR (400 MHz, CDCl<sub>3</sub>): δ = 1.45 (t, <sup>3</sup>*J* = 7 Hz, 6 H, 4-CO<sub>2</sub>CH<sub>2</sub>CH<sub>3</sub>), 4.50 (q, <sup>3</sup>*J* = 7 Hz, 4 H, 4-CO<sub>2</sub>CH<sub>2</sub>CH<sub>3</sub>), 8.40 (s, 2 H, 5-H). – <sup>13</sup>C-NMR (100 MHz, CDCl<sub>3</sub>): δ = 14.4 (4-CO<sub>2</sub>CH<sub>2</sub>CH<sub>3</sub>), 62.1 (4-CO<sub>2</sub>CH<sub>2</sub>CH<sub>3</sub>), 131.2 (C5), 148.7 (C4), 160.7 (4-CO<sub>2</sub>CH<sub>2</sub>CH<sub>3</sub>), 173.8 (C2). – HRMS (ESI<sup>+</sup>): *m/z* calcd for C<sub>12</sub>H<sub>13</sub>N<sub>4</sub>O<sub>4</sub>S<sub>2</sub> [M + H]<sup>+</sup> 341.0373, found 341.0374.

### 1.2.2 Synthesis of the azothiazole derivatives **7a–f** and **8a–f**

Ethyl (*E*)-5-(butylamino)-2-[(4-(ethoxycarbonyl)thiazol-2-yl)diazenyl]thiazole-4-carboxylate (**7a**) (cf. Table 1, Entry 2)

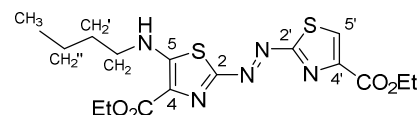

To a suspension of azothiazole **2g** (170 mg, 500 μmol) in CHCl<sub>3</sub> (6 mL) was added DABCO (112 mg, 1.00 mmol), which resulted in a color change from ochre to green. *n*-Butylamine (**5a**) (54.9 mg, 750 μmol, 74.1 μL) in CHCl<sub>3</sub> (4 mL) was added, which resulted in a color

change to red. The reaction mixture was stirred for 24 h at r.t. (TLC control). The reaction mixture was diluted with CHCl<sub>3</sub> (100 mL). The organic layer was washed with aq. HCl (*c* = 2 M, 2 x 25 mL), NaHCO<sub>3</sub> solution (sat., 50 mL) and NaCl solution (half saturated, 50 mL) dried with Na<sub>2</sub>SO<sub>4</sub> and filtered from the drying agent. The solvent was removed under reduced pressure. The product was isolated by flash column chromatography (SiO<sub>2</sub>; cyclohexane/EtOAc 7/3). The red fractions (*R*<sub>f</sub> = 0.32) were combined and **7a** was obtained as golden, amorphous solid (44.0 mg, 107 μmol, 21%); mp 188–191 °C (dec.) – <sup>1</sup>H-NMR (500 MHz, CDCl<sub>3</sub>): δ = 1.00 (t, <sup>3</sup>*J* = 8 Hz, 3 H, CH<sub>3</sub>), 1.44 (t, <sup>3</sup>*J* = 7 Hz, 3 H, 4-CO<sub>2</sub>CH<sub>2</sub>CH<sub>3</sub>), 1.44 (t, <sup>3</sup>*J* = 7 Hz, 3 H, 4'-CO<sub>2</sub>CH<sub>2</sub>CH<sub>3</sub>), 1.44–1.52 (m, 2 H, CH<sub>2</sub>''), 1.73–1.79 (m, 2 H, CH<sub>2</sub>'), 3.37–3.41 (m, 2 H, CH<sub>2</sub>), 4.44 (q, <sup>3</sup>*J* = 7 Hz, 2 H, 4-CO<sub>2</sub>CH<sub>2</sub>CH<sub>3</sub>), 4.46 (q, <sup>3</sup>*J* = 7 Hz, 2 H, 4'-CO<sub>2</sub>CH<sub>2</sub>CH<sub>3</sub>), 8.20 (s, 1 H, 5'-H), 8.46 (t, <sup>3</sup>*J* = 6 Hz, 1 H, NH). – <sup>13</sup>C-NMR (125 MHz, CDCl<sub>3</sub>): δ = 13.6 (CH<sub>3</sub>), 14.3 (4'-CO<sub>2</sub>CH<sub>2</sub>CH<sub>3</sub>), 14.5 (4-CO<sub>2</sub>CH<sub>2</sub>CH<sub>3</sub>), 20.0 (CH<sub>2</sub>''), 30.5 (CH<sub>2</sub>'), 49.5 (CH<sub>2</sub>), 61.3 (4-CO<sub>2</sub>CH<sub>2</sub>CH<sub>3</sub>), 61.7 (4'-CO<sub>2</sub>CH<sub>2</sub>CH<sub>3</sub>), 125.0 (C4), 129.0 (C5'), 147.5 (C4'), 154.0 (C2), 161.2 (4'-CO<sub>2</sub>CH<sub>2</sub>CH<sub>3</sub>), 165.0 (4-CO<sub>2</sub>CH<sub>2</sub>CH<sub>3</sub>), 166.6 (C5), 175.3 (C2'). – MS (ESI<sup>+</sup>): *m/z* = 412 (18) [M + H]<sup>+</sup>, 434 (76) [M + Na]<sup>+</sup>, 845 (100) [2M + Na]<sup>+</sup>, 1256 (27) [3M + Na]<sup>+</sup>. MS (ESI<sup>-</sup>): *m/z* = 410 (100) [M – H]<sup>-</sup>. – HRMS (ESI<sup>+</sup>): *m/z* calcd for C<sub>16</sub>H<sub>22</sub>N<sub>5</sub>O<sub>4</sub>S<sub>2</sub> [M + H]<sup>+</sup> 412.1108, found 412.1106.

Ethyl (*E*)-5-((3-(dimethylamino)propyl)amino)-2-((4-(ethoxycarbonyl)thiazol-2-yl)diazenyl)thiazole-4-carboxylate (**7b**) (cf. Table 1, Entry 5)

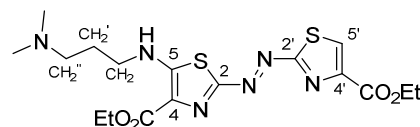

To a suspension of azothiazole **2g** (170 mg, 500 μmol) in CHCl<sub>3</sub> (6 mL) was added *N,N'*-dimethyl-1,3-propanediamine (**5b**) (76.6 mg, 750 μmol, 94.3 μL) in CHCl<sub>3</sub> (4 mL), which resulted in a color change to red. The reaction mixture was stirred for 2 h at r.t. (TLC control). The reaction mixture was diluted with CHCl<sub>3</sub> (150 mL). The organic layer was washed with water (40 mL) and NaCl solution (half saturated, 40 mL), dried with Na<sub>2</sub>SO<sub>4</sub> and filtered from the drying agent. The solvent was removed under reduced pressure. The product was isolated by flash column chromatography (SiO<sub>2</sub>; eluent: CHCl<sub>3</sub>/MeOH 9/1). The red fractions (*R*<sub>f</sub> = 0.24) were combined and **7b** was obtained as purple, amorphous solid (95.0 mg, 250 μmol, 50%); mp 164–167 °C (dec.) – <sup>1</sup>H-NMR (400 MHz, CDCl<sub>3</sub>): δ = 1.43 (t, <sup>3</sup>*J* = 7 Hz, 3 H, 4-CO<sub>2</sub>CH<sub>2</sub>CH<sub>3</sub>), 1.43 (t, <sup>3</sup>*J* = 7 Hz, 3 H, 4'-CO<sub>2</sub>CH<sub>2</sub>CH<sub>3</sub>), 1.90 (tt, <sup>3</sup>*J* = 6 Hz, <sup>3</sup>*J* = 6 Hz, 2 H, CH<sub>2</sub>'), 2.29 (s, 6 H, NMe<sub>2</sub>), 2.50 (t, <sup>3</sup>*J* = 6 Hz, 2 H, CH<sub>2</sub>''), 3.47 (t, <sup>3</sup>*J* = 6 Hz, 2 H, CH<sub>2</sub>), 4.43 (q, <sup>3</sup>*J* = 7 Hz, 2 H, 4-CO<sub>2</sub>CH<sub>2</sub>CH<sub>3</sub>), 4.46 (q, <sup>3</sup>*J* = 7 Hz, 2 H, 4'-CO<sub>2</sub>CH<sub>2</sub>CH<sub>3</sub>), 8.17 (s, 1 H, 5'-H), 9.76 (br. s, 1 H, 5-NH). – <sup>13</sup>C-NMR (100 MHz, CDCl<sub>3</sub>): δ = 14.4 (4'-CO<sub>2</sub>CH<sub>2</sub>CH<sub>3</sub>), 14.5 (4-CO<sub>2</sub>CH<sub>2</sub>CH<sub>3</sub>), 25.2 (CH<sub>2</sub>'), 45.2 (NMe<sub>2</sub>), 49.9 (CH<sub>2</sub>), 57.7 (CH<sub>2</sub>''), 61.0 (4-CO<sub>2</sub>CH<sub>2</sub>CH<sub>3</sub>), 61.6 (4'-CO<sub>2</sub>CH<sub>2</sub>CH<sub>3</sub>), 125.6 (C4), 128.7 (C5'), 147.3 (C4'), 153.5 (C2), 161.2 (4'

$\text{CO}_2\text{CH}_2\text{CH}_3$ ), 164.2 (4- $\text{CO}_2\text{CH}_2\text{CH}_3$ ), 166.4 (C5), 175.6 (C2'). – HRMS (ESI<sup>+</sup>):  $m/z$  calcd for  $\text{C}_{17}\text{H}_{25}\text{N}_6\text{O}_4\text{S}_2$  [M + H]<sup>+</sup> 441.1373, found 441.1374.

Ethyl (*E*)-5-((3-((*tert*-butoxycarbonyl)amino)propyl)amino)-2-((4-(ethoxycarbonyl)thiazol-2-yl)diazenyl)thiazole-4-carboxylate (**7c**) (cf. Table 1, Entry 7)

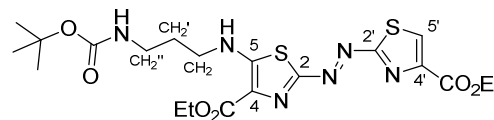

*N*-Boc-1,3-propanediamine (**5c**) was prepared according to a published procedure<sup>[4]</sup> from propane-1,3-diamine (22.2 g, 300 mmol, 25.3 mL) and di-*tert*-butyl dicarbonate (6.55 g, 30.0 mmol) and obtained as colorless oil that solidified on standing (4.74 g, 27.2 mmol, 91%). The <sup>1</sup>H-NMR spectroscopic data matched the reported ones.<sup>[4]</sup>

To a suspension of azothiazole **2g** (85.1 mg, 250 μmol) in  $\text{CHCl}_3$  (15 mL) was added *N*-Boc-1,3-propanediamine (**5c**) (174 mg, 1.00 mmol) in  $\text{CHCl}_3$  (3 mL), which resulted in a color change to red. The reaction mixture was stirred for 120 d at r.t. (TLC control). The reaction mixture was diluted with  $\text{CHCl}_3$  (30 mL). The organic layer was washed with aq. HCl ( $c = 1$  M, 12 mL),  $\text{H}_2\text{O}$  (20 mL) and NaCl solution (half saturated, 20 mL), dried with  $\text{Na}_2\text{SO}_4$  and filtered from the drying agent. The solvent was removed under reduced pressure. The product was isolated by flash column chromatography ( $\text{SiO}_2$ ; cyclohexane/EtOAc 1/1). The red fractions ( $R_f = 0.38$ ) were combined and **7c** was obtained as red, amorphous solid (21.0 mg, 41.0 μmol, 16%); mp 169–174 °C (dec.) – <sup>1</sup>H-NMR (600 MHz,  $\text{CDCl}_3$ ):  $\delta = 1.41$  (t, <sup>3</sup> $J = 7$  Hz, 3 H, 4- $\text{CO}_2\text{CH}_2\text{CH}_3$ ), 1.41 (t, <sup>3</sup> $J = 7$  Hz, 3 H, 4'- $\text{CO}_2\text{CH}_2\text{CH}_3$ ), 1.43 [s, 9 H,  $\text{CO}_2\text{C}(\text{CH}_3)_3$ ], 1.91 (tt, <sup>3</sup> $J = 6$  Hz, <sup>3</sup> $J = 6$  Hz, 2 H,  $\text{CH}_2'$ ), 3.26 [dt, <sup>3</sup> $J = 6$  Hz, <sup>3</sup> $J = 6$  Hz, 2 H,  $\text{CH}_2''$ ), 3.44 [dt, <sup>3</sup> $J = 6$  Hz, <sup>3</sup> $J = 6$  Hz, 2 H,  $\text{CH}_2$ ], 4.42 (q, <sup>3</sup> $J = 7$  Hz, 2 H, 4- $\text{CO}_2\text{CH}_2\text{CH}_3$ ), 4.43 (q, <sup>3</sup> $J = 7$  Hz, 2 H, 4'- $\text{CO}_2\text{CH}_2\text{CH}_3$ ), 4.81 [br. s, 1 H,  $\text{NHCO}_2\text{C}(\text{CH}_3)_3$ ], 8.18 (s, 1 H, 5'-H), 8.68 (br. s, 1 H, 5-NH). – <sup>13</sup>C-NMR (150 MHz,  $\text{CDCl}_3$ ):  $\delta = 14.3$  (4'- $\text{CO}_2\text{CH}_2\text{CH}_3$ ), 14.4 (4- $\text{CO}_2\text{CH}_2\text{CH}_3$ ), 28.3 [ $\text{CO}_2\text{C}(\text{CH}_3)_3$ ], 29.1 ( $\text{CH}_2'$ ), 37.4 ( $\text{CH}_2''$ ), 47.1 ( $\text{CH}_2$ ), 61.2 (4- $\text{CO}_2\text{CH}_2\text{CH}_3$ ), 61.6 (4'- $\text{CO}_2\text{CH}_2\text{CH}_3$ ), 79.7 [ $\text{CO}_2\text{C}(\text{CH}_3)_3$ ], 125.4 (C4), 128.9 (C5'), 147.4 (C4'), 153.8 (C2), 156.4 [ $\text{CO}_2\text{C}(\text{CH}_3)_3$ ], 161.1 (4'- $\text{CO}_2\text{CH}_2\text{CH}_3$ ), 164.5 (4- $\text{CO}_2\text{CH}_2\text{CH}_3$ ), 166.2 (C5), 175.2 (C2'). – HRMS (ESI<sup>+</sup>):  $m/z$  calcd for  $\text{C}_{20}\text{H}_{29}\text{N}_6\text{O}_6\text{S}_2$  [M + H]<sup>+</sup> 513.1585, found 513.1585.

Ethyl (*E*)-2-((4-(ethoxycarbonyl)thiazol-2-yl)diazenyl)-5-(*p*-tolylamino)thiazole-4-carboxylate (**7d**) (cf. Table 1, Entry 12)

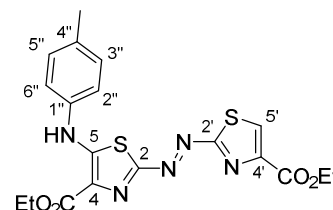

To a suspension of azothiazole **2g** (170 mg, 500 μmol) in MeCN (6 mL) was added DABCO (112 mg, 1.00 mmol), which resulted in a color change from ochre to green. *p*-Toluidine (**5d**)

(161 mg, 1.50 mmol) in MeCN (4 mL) was added, which resulted in a color change to red/purple. The reaction mixture was stirred for 7 d at r.t. (TLC control). The solvent was removed under reduced pressure. The residue was dissolved in CHCl<sub>3</sub> (200 mL). The organic layer was washed with aq. HCl (*c* = 2 M, 2 x 25 mL) and NaCl solution (half saturated, 50 mL), dried with Na<sub>2</sub>SO<sub>4</sub> and filtered from the drying agent. The solvent was removed under reduced pressure. The product was isolated by flash column chromatography (SiO<sub>2</sub>; cyclohexane/EtOAc 4/1). The red fractions (*R<sub>f</sub>* = 0.31) were combined. The product **7d** was further purified by column chromatography (SiO<sub>2</sub>; CHCl<sub>3</sub>, *R<sub>f</sub>* = 0.23), washed with *n*-hexane and obtained as red, amorphous solid (41 mg, 92 μmol, 18%); mp > 225 °C (dec.) – <sup>1</sup>H-NMR (500 MHz, CDCl<sub>3</sub>): δ = 1.43 (t, <sup>3</sup>*J* = 7 Hz, 3 H, 4'-CO<sub>2</sub>CH<sub>2</sub>CH<sub>3</sub>), 1.48 (t, <sup>3</sup>*J* = 7 Hz, 3 H, 4'-CO<sub>2</sub>CH<sub>2</sub>CH<sub>3</sub>), 2.39 (s, 3 H, 4''-CH<sub>3</sub>), 4.46 (q, <sup>3</sup>*J* = 7 Hz, 2 H, 4'-CO<sub>2</sub>CH<sub>2</sub>CH<sub>3</sub>), 4.51 (q, <sup>3</sup>*J* = 7 Hz, 2 H, 4-CO<sub>2</sub>CH<sub>2</sub>CH<sub>3</sub>), 7.23–7.28 (m, 4 H, 2''-H, 3''-H, 5''-H, 6''-H), 8.23 (s, 1 H, 5'-H), 10.54 (s, 1 H, 5-NH). – <sup>13</sup>C-NMR (125 MHz, CDCl<sub>3</sub>): δ = 14.3 (4'-CO<sub>2</sub>CH<sub>2</sub>CH<sub>3</sub>), 14.5 (4-CO<sub>2</sub>CH<sub>2</sub>CH<sub>3</sub>), 21.0 (4''-CH<sub>3</sub>), 61.7 (4'-CO<sub>2</sub>CH<sub>2</sub>CH<sub>3</sub>), 61.7 (4-CO<sub>2</sub>CH<sub>2</sub>CH<sub>3</sub>), 119.8 (C2'', C6''), 126.9 (C4), 129.3 (C5'), 130.5 (C3'', C5''), 136.3 (C1''), 136.3 (C4''), 147.8 (C4'), 154.7 (C2), 160.2 (C5), 161.1 (4'-CO<sub>2</sub>CH<sub>2</sub>CH<sub>3</sub>), 165.2 (4-CO<sub>2</sub>CH<sub>2</sub>CH<sub>3</sub>), 174.9 (C2'). – HRMS (ESI<sup>+</sup>): *m/z* calcd for C<sub>19</sub>H<sub>20</sub>N<sub>5</sub>O<sub>4</sub>S<sub>2</sub> [M + H]<sup>+</sup> 446.0951, found 446.0953.

Diethyl 2,2'-(diazene-1,2-diyl)-(E)-bis(5-(butylamino)thiazole-4-carboxylate) (**8a**) (cf. Table 1, Entry 3)

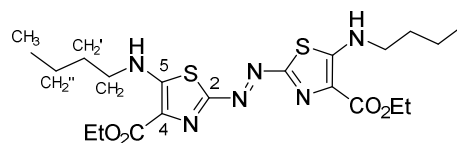

To a suspension of azothiazole **2g** (170 mg, 500 μmol) in THF (40 mL) was added *n*-butylamine (**5a**) (110 mg, 1.50 mmol, 148 μL), which resulted in an immediate color change to purple. The reaction mixture was stirred for 12 d at r.t., whereas additional amine **5a** (50 μL each) was added after 8 and 9 days of stirring (TLC control on SiO<sub>2</sub>; cyclohexane/EtOAc 4/1; *R<sub>f</sub>* = 0.23 for bis-substituted purple product **8a**, *R<sub>f</sub>* = 0.13 for mono-substituted red product **7a**). H<sub>2</sub>O (50 mL) was added and the reaction mixture was extracted with CHCl<sub>3</sub> (2 x 100 mL). The combined organic layers were washed with NaCl solution (half-saturated, 50 mL), dried with Na<sub>2</sub>SO<sub>4</sub> and filtered from the drying agent. The solvent was removed under reduced pressure. The product was isolated by column chromatography (SiO<sub>2</sub>; cyclohexane/EtOAc 4/1). The purple fractions (*R<sub>f</sub>* = 0.23) were combined and **8a** was obtained as golden, amorphous solid (68.0 mg, 141 μmol, 28%). Further crystallization from EtOAc at –20 °C gave **8a** in the form of fine, golden needles; mp = 214–216 °C (dec.). – <sup>1</sup>H-NMR (400 MHz, CDCl<sub>3</sub>): δ = 0.98 (t, <sup>3</sup>*J* = 7 Hz, 6 H, CH<sub>3</sub>), 1.43 (t, <sup>3</sup>*J* = 7 Hz, 6 H, 4-CO<sub>2</sub>CH<sub>2</sub>CH<sub>3</sub>), 1.41–1.51 (m, 4 H, CH<sub>2</sub>''), 1.69–1.76 (m, 4 H, CH<sub>2</sub>'), 3.34 (dt, <sup>3</sup>*J* = 7 Hz, <sup>3</sup>*J* = 6 Hz, 4 H, CH<sub>2</sub>), 4.41 (q, <sup>3</sup>*J* = 7 Hz, 4 H, 4-CO<sub>2</sub>CH<sub>2</sub>CH<sub>3</sub>), 8.15 (t, <sup>3</sup>*J* = 6 Hz, 2 H, 5-NH). – <sup>13</sup>C-NMR (100 MHz, CDCl<sub>3</sub>): δ = 13.6 (CH<sub>3</sub>), 14.6 (4-CO<sub>2</sub>CH<sub>2</sub>CH<sub>3</sub>), 20.0 (CH<sub>2</sub>''), 30.7 (CH<sub>2</sub>'), 49.2

(CH<sub>2</sub>), 60.8 (4-CO<sub>2</sub>CH<sub>2</sub>CH<sub>3</sub>), 122.4 (C4), 155.4 (C2), 165.2 (4-CO<sub>2</sub>CH<sub>2</sub>CH<sub>3</sub>), 165.2 (C5). – MS (ESI<sup>+</sup>): *m/z* = 483 (40) [M + H]<sup>+</sup>, 505 (100) [M + Na]<sup>+</sup>, 987 (87) [2M + Na]<sup>+</sup>, 1469 (23) [3M + Na]<sup>+</sup>. – MS (ESI<sup>-</sup>): *m/z* = 481 (100) [M – H]<sup>-</sup>. – HRMS (ESI<sup>+</sup>): *m/z* calcd for C<sub>20</sub>H<sub>31</sub>N<sub>6</sub>O<sub>4</sub>S<sub>2</sub> [M+H]<sup>+</sup> 483.1843, found 483.1847.

Diethyl 2,2'-(diazene-1,2-diyl)-(E)-bis(5-((3-(dimethyl-amino)propyl)amino)thiazole-4-carboxylate) (**8b**) (cf. Table 1, Entry 6)

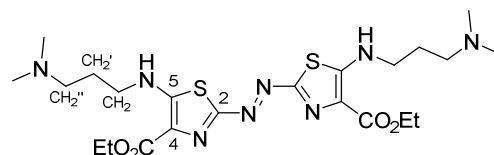

To a suspension of azothiazole **2g** (102 mg, 300 μmol) in THF (24 mL) was added *N,N'*-dimethyl-1,3-propanediamine (**5b**) (91.7 mg, 900 μmol, 113 μL), which resulted in an immediate color change to purple. The reaction mixture was stirred for 9 d at r.t., whereas additional amine **5b** (40 μL) was added after 1 day of stirring (TLC control on SiO<sub>2</sub>: CHCl<sub>3</sub>/MeOH 9/1; *R<sub>f</sub>* = 0.07 for bis-substituted purple product **8b**, *R<sub>f</sub>* = 0.24 for mono-substituted red product **7b**). A solution of NaHCO<sub>3</sub> (sat.; 50 mL) was added and the reaction mixture was extracted with CHCl<sub>3</sub> (3 x 100 mL). The solvent was removed under reduced pressure. The product **8b** was isolated by crystallization from MeOH (50 °C → -20 °C) as dark green, amorphous solid (61.0 mg, 113 μmol, 38%); mp = 182–185 °C (dec.). – <sup>1</sup>H-NMR (400 MHz, CDCl<sub>3</sub>): δ = 1.41 (t, <sup>3</sup>*J* = 7 Hz, 6 H, 4-CO<sub>2</sub>CH<sub>2</sub>CH<sub>3</sub>), 1.86 (tt, <sup>3</sup>*J* = 6 Hz, <sup>3</sup>*J* = 6 Hz, 4 H, CH<sub>2</sub>'), 2.25 (s, 12 H, NMe<sub>2</sub>), 2.43 (t, <sup>3</sup>*J* = 6 Hz, 4 H, CH<sub>2</sub>''), 3.40 (dt, <sup>3</sup>*J* = 6 Hz, <sup>3</sup>*J* = 5 Hz, 4 H, CH<sub>2</sub>), 4.40 (q, <sup>3</sup>*J* = 7 Hz, 4 H, 4-CO<sub>2</sub>CH<sub>2</sub>CH<sub>3</sub>), 8.85 (br. s, 2 H, 5-NH). – <sup>13</sup>C-NMR (100 MHz, CDCl<sub>3</sub>): δ = 14.6 (4-CO<sub>2</sub>CH<sub>2</sub>CH<sub>3</sub>), 26.0 (CH<sub>2</sub>'), 45.3 (NMe<sub>2</sub>), 48.8 (CH<sub>2</sub>), 57.3 (CH<sub>2</sub>''), 60.6 (4-CO<sub>2</sub>CH<sub>2</sub>CH<sub>3</sub>), 122.5 (C4), 155.3 (C2), 164.7 (4-CO<sub>2</sub>CH<sub>2</sub>CH<sub>3</sub>), 165.0 (C5). – MS (ESI<sup>+</sup>): *m/z* = 541 (100) [M + H]<sup>+</sup>, 563 (80) [M + Na]<sup>+</sup>, 1081 (45) [2M + H]<sup>+</sup>, 1103 (30) [2M + Na]<sup>+</sup>. – HRMS (ESI<sup>+</sup>): *m/z* calcd for C<sub>22</sub>H<sub>37</sub>N<sub>8</sub>O<sub>4</sub>S<sub>2</sub> [M + H]<sup>+</sup> 541.2374, found 541.2374.

Diethyl 2,2'-(diazene-1,2-diyl)-(E)-bis(5-((3-((tert-butoxy-carbonyl)amino)propyl)amino)thiazole-4-carboxylate) (**8c**) (cf. Table 1, Entry 11)

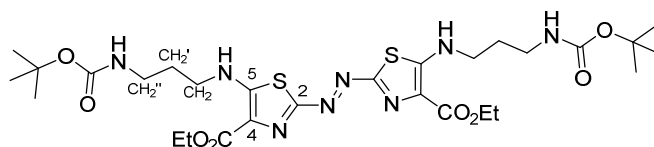

To a suspension of azothiazole **2g** (170 mg, 500 μmol) in MeCN (6 mL) was added DABCO (112 mg, 1.00 mmol), which resulted in a color change from ochre to green. *N*-Boc-1,3-propanediamine<sup>[4]</sup> (**5c**) (261 mg, 1.50 mmol) in MeCN (4 mL) was added, which resulted in a color change to red/purple. The reaction mixture was stirred for 16 h at r.t. (TLC control on SiO<sub>2</sub>; cyclohexane/EtOAc 1/1; *R<sub>f</sub>* = 0.29 for bis-substituted purple product **8c**, *R<sub>f</sub>* = 0.38 for



mono-substituted red product **7c**). The solvent was removed under reduced pressure. The residue was dissolved in CHCl<sub>3</sub> (200 mL). The organic layer was washed with aq. HCl (*c* = 2 M, 2 x 25 mL), NaHCO<sub>3</sub> solution (sat., 50 mL) and NaCl solution (half saturated, 50 mL), dried with Na<sub>2</sub>SO<sub>4</sub> and filtered from the drying agent. The solvent was removed under reduced pressure. The crude product was isolated by flash column chromatography (SiO<sub>2</sub>; cyclohexane/EtOAc 1/1). The purple fractions (*R*<sub>f</sub> = 0.29) were combined and **8c** was obtained as purple, amorphous solid (120 mg, 175 μmol, 35%); mp = 210–212 °C (dec.) – <sup>1</sup>H-NMR (400 MHz, CDCl<sub>3</sub>): δ = 1.42 (t, <sup>3</sup>*J* = 7 Hz, 6 H, 4-CO<sub>2</sub>CH<sub>2</sub>CH<sub>3</sub>), 1.46 [s, 18 H, CO<sub>2</sub>C(CH<sub>3</sub>)<sub>3</sub>], 1.90 (tt, <sup>3</sup>*J* = 6 Hz, <sup>3</sup>*J* = 6 Hz, 4 H, CH<sub>2</sub>'), 3.26 (dt, <sup>3</sup>*J* = 6 Hz, <sup>3</sup>*J* = 6 Hz, 4 H, CH<sub>2</sub>''), 3.40 (dt, <sup>3</sup>*J* = 6 Hz, <sup>3</sup>*J* = 6 Hz, 4 H, CH<sub>2</sub>), 4.41 (q, <sup>3</sup>*J* = 7 Hz, 4 H, 4-CO<sub>2</sub>CH<sub>2</sub>CH<sub>3</sub>), 4.67 [br. s, 2 H, NHCO<sub>2</sub>C(CH<sub>3</sub>)<sub>3</sub>], 8.30 (br. s, 2 H, 5-NH). – <sup>13</sup>C-NMR (100 MHz, CDCl<sub>3</sub>): δ = 14.5 (4-CO<sub>2</sub>CH<sub>2</sub>CH<sub>3</sub>), 28.4 [CO<sub>2</sub>C(CH<sub>3</sub>)<sub>3</sub>], 29.4 (CH<sub>2</sub>'), 37.7 (CH<sub>2</sub>''), 46.8 (CH<sub>2</sub>), 60.9 (4-CO<sub>2</sub>CH<sub>2</sub>CH<sub>3</sub>), 79.7 [CO<sub>2</sub>C(CH<sub>3</sub>)<sub>3</sub>], 122.8 (C4), 155.4 (C2), 156.2 [CO<sub>2</sub>C(CH<sub>3</sub>)<sub>3</sub>], 164.9 (4-CO<sub>2</sub>CH<sub>2</sub>CH<sub>3</sub>), 164.9 (C5). – HRMS (ESI<sup>+</sup>): *m/z* calcd for C<sub>28</sub>H<sub>45</sub>N<sub>8</sub>O<sub>8</sub>S<sub>2</sub> [M + H]<sup>+</sup> 685.2796, found 685.2777.

Diethyl 2,2'-(diazene-1,2-diyl)-(*E*)-bis(5-(*p*-tolylamino)thiazole-4-carboxylate) (**8d**) (cf. Table 1, Entry 12)

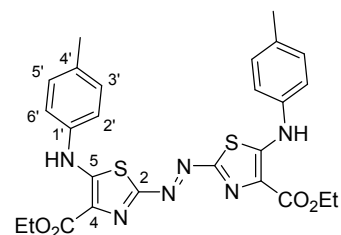

The product **8d** was isolated as side product during the synthesis of **7d** by flash column chromatography (SiO<sub>2</sub>; cyclohexane/EtOAc 4/1). The blue fractions (*R*<sub>f</sub> = 0.44) were combined. The product **8d** was further purified by column chromatography (SiO<sub>2</sub>; CHCl<sub>3</sub>, *R*<sub>f</sub> = 0.42), washed with *n*-hexane and obtained as golden, amorphous solid (7.0 mg, 13 μmol, 3%). – <sup>1</sup>H-NMR (500 MHz, CDCl<sub>3</sub>): δ = 1.47 (t, <sup>3</sup>*J* = 7 Hz, 6 H, 4-CO<sub>2</sub>CH<sub>2</sub>CH<sub>3</sub>), 2.38 (s, 6 H, 4'-CH<sub>3</sub>), 4.48 (q, <sup>3</sup>*J* = 7 Hz, 4 H, 4-CO<sub>2</sub>CH<sub>2</sub>CH<sub>3</sub>), 7.21–7.25 (m, 8 H, 2'-H, 3'-H, 5'-H, 6'-H), 10.35 (s, 2 H, 5-NH). – <sup>13</sup>C-NMR (125 MHz, CDCl<sub>3</sub>): δ = 14.5 (4-CO<sub>2</sub>CH<sub>2</sub>CH<sub>3</sub>), 20.9 (4'-CH<sub>3</sub>), 61.3 (4-CO<sub>2</sub>CH<sub>2</sub>CH<sub>3</sub>), 119.4 (C2', C6'), 125.2 (C4), 130.4 (C3', C5'), 135.4 (C4'), 136.8 (C1'), 155.9 (C2), 158.7 (C5), 165.4 (4-CO<sub>2</sub>CH<sub>2</sub>CH<sub>3</sub>). – HRMS (ESI<sup>+</sup>): *m/z* calcd for C<sub>26</sub>H<sub>27</sub>N<sub>6</sub>O<sub>4</sub>S<sub>2</sub> [M + H]<sup>+</sup> 551.1530, found 551.1533.

Diethyl 2,2'-(diazene-1,2-diyl)-(E)-bis(5-((4-(dimethylamino)phenyl)amino)thiazole-4-carboxylate) (**8e**)  
(cf. Table 1, Entry 13)

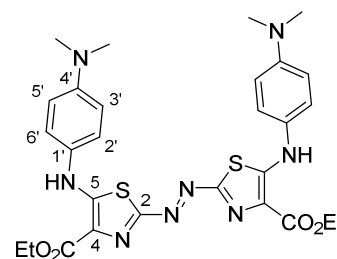

*N,N*-Dimethyl-*p*-phenylenediamine (**5e**) was distilled prior to use (0.014 mbar, 70–72 °C). The obtained yellow oil was stored under an argon atmosphere at 4 °C.

To a suspension of azothiazole **2g** (170 mg, 500 μmol) in MeCN (6 mL) was added DABCO (112 mg, 1.00 mmol), which resulted in a color change from ochre to green. *N,N*-Dimethyl-*p*-phenylenediamine (**5e**) (272 mg, 2.00 mmol, 250 μL) in MeCN (4 mL) was added, which resulted in a color change to red/purple. The reaction mixture was stirred for 7 d at r.t, whereas additional amine **5e** (~200 μL) was added after 2 days of stirring. The solvent was removed under reduced pressure. The residue was dissolved in CHCl<sub>3</sub> (200 mL). The organic layer was washed with water (50 mL) and NaCl solution (half saturated, 50 mL), dried with Na<sub>2</sub>SO<sub>4</sub> and filtered from the drying agent. The solvent was removed under reduced pressure. The product was isolated by two-fold flash column chromatography [firstly: SiO<sub>2</sub>; CHCl<sub>3</sub> (*R<sub>f</sub>* = 0.19), then CHCl<sub>3</sub>/MeOH 200/1 and secondly: SiO<sub>2</sub>; cyclohexane/EtOAc 1/1 (*R<sub>f</sub>* = 0), then CHCl<sub>3</sub>/MeOH 98/2]. For further purification the blue fraction was subjected to column chromatography (Al<sub>2</sub>O<sub>3</sub> neutral, activity grade I; CHCl<sub>3</sub>/cyclohexane, *R<sub>f</sub>* = 0.46). The product **8e** was washed with *n*-hexane and obtained as dark blue, amorphous solid (4.4 mg, 7.2 μmol, 1%). – <sup>1</sup>H-NMR (500 MHz, CDCl<sub>3</sub>): δ = 1.46 (t, <sup>3</sup>*J* = 7 Hz, 6 H, 4-CO<sub>2</sub>CH<sub>2</sub>CH<sub>3</sub>), 3.00 (s, 12 H, 4'-NMe<sub>2</sub>), 4.46 (q, <sup>3</sup>*J* = 7 Hz, 4 H, 4-CO<sub>2</sub>CH<sub>2</sub>CH<sub>3</sub>), 6.74 (d, <sup>3</sup>*J* = 9 Hz, 4 H, 3'-H, 5'-H), 7.21 (d, <sup>3</sup>*J* = 9 Hz, 4 H, 2'-H, 6'-H), 10.09 (s, 2 H, 5-NH). – <sup>13</sup>C-NMR (125 MHz, CDCl<sub>3</sub>): δ = 14.6 (4-CO<sub>2</sub>CH<sub>2</sub>CH<sub>3</sub>), 40.6 (4'-NMe<sub>2</sub>), 61.1 (4-CO<sub>2</sub>CH<sub>2</sub>CH<sub>3</sub>), 113.0 (C3', C5'), 121.6 (C2', C6'), 124.4 (C4), 128.8 (C1'), 148.7 (C4'), 155.4 (C2), 160.2 (C5), 165.5 (4-CO<sub>2</sub>CH<sub>2</sub>CH<sub>3</sub>). – HRMS (ESI<sup>+</sup>): *m/z* calcd for C<sub>28</sub>H<sub>33</sub>N<sub>8</sub>O<sub>4</sub>S<sub>2</sub> [M+H]<sup>+</sup> 609.2061, found 609.2041.

#### General procedure for the deprotection of the Boc-protected azothiazole derivatives **7c** and **8c** (GP1)

To a solution of the Boc-protected azothiazole derivatives **7c** and **8c** in CH<sub>2</sub>Cl<sub>2</sub> was added dropwise TFA at 0 °C. The solution was stirred for 2 h at 0 °C and for 2 h at r.t (TLC control). The solvent was removed under reduced pressure. In order to remove excess TFA the residue was redissolved in CH<sub>2</sub>Cl<sub>2</sub> (20 mL) and the solvent was removed under reduced pressure. This process was repeated four times. The product was finally washed with CH<sub>2</sub>Cl<sub>2</sub> (2 x 50 mL) and dried.

(*E*)-3-((4-(Ethoxycarbonyl)-2-((4-(ethoxycarbonyl)thiazol-2-yl)diazenyl)thiazol-5-yl)amino)propan-1-aminium trifluoroacetate (**7f**)

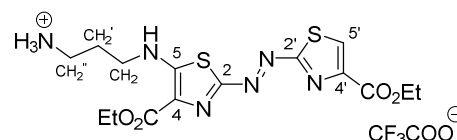

The azothiazole derivative **7c** (64.1 mg, 125  $\mu$ mol) in  $\text{CH}_2\text{Cl}_2$  (8 mL) was treated with TFA (1 mL) according to GP1. The product **7f** was obtained as red, amorphous solid (63.0 mg, 120  $\mu$ mol, 96%); mp 180–183  $^\circ\text{C}$  (dec.). –  $R_f$  ( $\text{SiO}_2$ ,  $\text{CHCl}_3/\text{MeOH}$  9/1) = 0.18. –  $^1\text{H-NMR}$  (500 MHz,  $\text{DMSO-}d_6$ ):  $\delta$  = 1.33 (t,  $^3J$  = 7 Hz, 3 H, 4'- $\text{CO}_2\text{CH}_2\text{CH}_3$ ), 1.34 (t,  $^3J$  = 7 Hz, 3 H, 4- $\text{CO}_2\text{CH}_2\text{CH}_3$ ), 1.96 (tt,  $^3J$  = 7 Hz,  $^3J$  = 7 Hz, 2 H,  $\text{CH}_2'$ ), 2.86–2.92 (m, 2 H,  $\text{CH}_2''$ ), 3.53 [dt,  $^3J$  = 6 Hz,  $^3J$  = 6 Hz, 2 H,  $\text{CH}_2$ ), 4.33 (q,  $^3J$  = 7 Hz, 2 H, 4'- $\text{CO}_2\text{CH}_2\text{CH}_3$ ), 4.35 (q,  $^3J$  = 7 Hz, 2 H, 4- $\text{CO}_2\text{CH}_2\text{CH}_3$ ), 7.79 (br. s, 3 H,  $\text{NH}_3^+$ ), 8.58 (s, 1 H, 5'-H), 9.21 (t,  $^3J$  = 6 Hz, 1 H, 5-NH). –  $^{13}\text{C-NMR}$  (125 MHz,  $\text{DMSO-}d_6$ ):  $\delta$  = 14.1 (4'- $\text{CO}_2\text{CH}_2\text{CH}_3$ ), 14.3 (4- $\text{CO}_2\text{CH}_2\text{CH}_3$ ), 25.3 ( $\text{CH}_2'$ ), 36.5 ( $\text{CH}_2''$ ), 47.1 ( $\text{CH}_2$ ), 60.6 (4- $\text{CO}_2\text{CH}_2\text{CH}_3$ ), 61.1 (4'- $\text{CO}_2\text{CH}_2\text{CH}_3$ ), 125.7 (C4), 130.5 (C5'), 146.4 (C4'), 152.2 (C2), 160.4 (4'- $\text{CO}_2\text{CH}_2\text{CH}_3$ ), 163.1 (4- $\text{CO}_2\text{CH}_2\text{CH}_3$ ), 166.2 (C5), 174.6 (C2'). – HRMS (ESI $^+$ ):  $m/z$  calcd for  $\text{C}_{15}\text{H}_{21}\text{N}_6\text{O}_4\text{S}_2$  [ $\text{M}$ ] $^+$  413.1060, found 413.1056.

(*E*)-3,3'-((Diazene-1,2-diylbis(4-(ethoxycarbonyl)thiazole-2,5-diyl))bis(azanediyl))bis(propan-1-aminium) bistrifluoroacetate (**8f**)

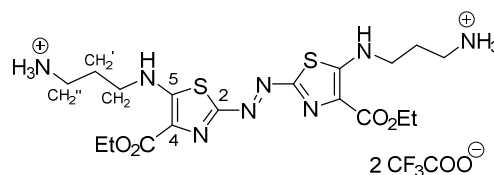

The azothiazole derivative **8d** (120 mg, 175  $\mu$ mol) in  $\text{CH}_2\text{Cl}_2$  (12 mL) was treated with TFA (1.5 mL) according to GP1. The product **8f** was obtained as purple, amorphous solid (120 mg, 163  $\mu$ mol, 96%); mp 215–217 $^\circ\text{C}$  (dec.). –  $^1\text{H-NMR}$  (500 MHz,  $\text{DMSO-}d_6$ ):  $\delta$  = 1.32 (t,  $^3J$  = 7 Hz, 6 H, 4- $\text{CO}_2\text{CH}_2\text{CH}_3$ ), 1.93 (tt,  $^3J$  = 7 Hz,  $^3J$  = 7 Hz, 4 H,  $\text{CH}_2'$ ), 2.84–2.90 (m, 4 H,  $\text{CH}_2''$ ), 3.46 (dt,  $^3J$  = 6 Hz,  $^3J$  = 6 Hz, 4 H,  $\text{CH}_2$ ), 4.30 (q,  $^3J$  = 7 Hz, 4 H, 4- $\text{CO}_2\text{CH}_2\text{CH}_3$ ), 7.81 (br. s, 6 H,  $\text{NH}_3^+$ ), 8.73 (t,  $^3J$  = 6 Hz, 2 H, 5-NH). –  $^{13}\text{C-NMR}$  (125 MHz,  $\text{DMSO-}d_6$ ):  $\delta$  = 14.3 (4- $\text{CO}_2\text{CH}_2\text{CH}_3$ ), 25.6 ( $\text{CH}_2'$ ), 36.5 ( $\text{CH}_2''$ ), 46.5 ( $\text{CH}_2$ ), 60.1 (4- $\text{CO}_2\text{CH}_2\text{CH}_3$ ), 122.3 (C4), 153.6 (C2), 163.5 (4- $\text{CO}_2\text{CH}_2\text{CH}_3$ ), 164.3 (C5). – MS (ESI $^+$ ):  $m/z$  = 485 (90) [ $\text{M} - \text{H}$ ] $^+$ , 507 (100) [ $\text{M} - 2\text{H} + \text{Na}$ ] $^+$ , 991 (87) [ $2\text{M} - 4\text{H} + \text{Na}$ ] $^+$ , 1475 (32) [ $3\text{M} - 6\text{H} + \text{Na}$ ] $^+$ . – HRMS (ESI $^+$ ):  $m/z$  calcd for  $\text{C}_{18}\text{H}_{29}\text{N}_8\text{O}_4\text{S}_2$  [ $\text{M} - \text{H}$ ] $^+$  485.1748, found 485.1746.

## 2 Additional spectroscopic data

### 2.1 Absorption and emission properties

**Table S1.** Absorption properties of Azothiazole Derivatives **7f** and **8f**.

| Solvent <sup>a</sup> | <b>7f</b>                |                  | <b>8f</b>                |                  |
|----------------------|--------------------------|------------------|--------------------------|------------------|
|                      | $\lambda_{\text{abs}}^b$ | $\lg \epsilon^c$ | $\lambda_{\text{abs}}^b$ | $\lg \epsilon^c$ |
| H <sub>2</sub> O     | - <sup>d</sup>           | - <sup>d</sup>   | 579                      | 4.58             |
| MeOH                 | 531                      | 4.38             | 577                      | 4.65             |
| DMSO                 | 587                      | 4.72             | 590                      | 4.67             |

<sup>a</sup>Solvents arranged in order of decreasing  $E_{\text{T}}^{30}$  values. <sup>b</sup>Long-wavelength absorption maximum in nm;  $c = 10 \mu\text{M}$ .

<sup>c</sup>Molar extinction coefficient in  $\text{cm}^{-1} \text{M}^{-1}$ . <sup>d</sup>Not (fully) soluble.

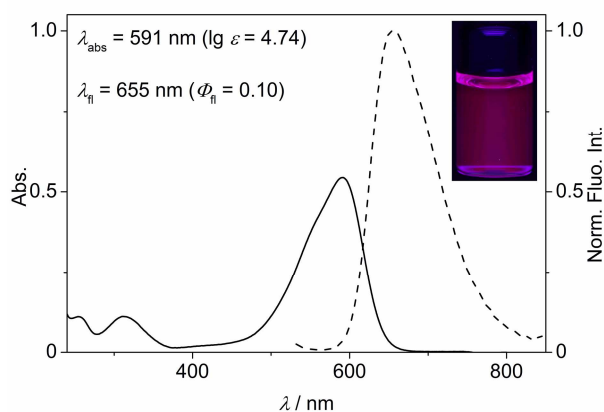

**Figure S1.** Absorption (solid line), normalized emission spectrum ( $\lambda_{\text{ex}} = 515 \text{ nm}$ , dashed line) and fluorescence color ( $\lambda_{\text{ex}} = 366 \text{ nm}$ ) of derivative **8b** in glycerol ( $c = 10 \mu\text{M}$  with 1% DMSO).

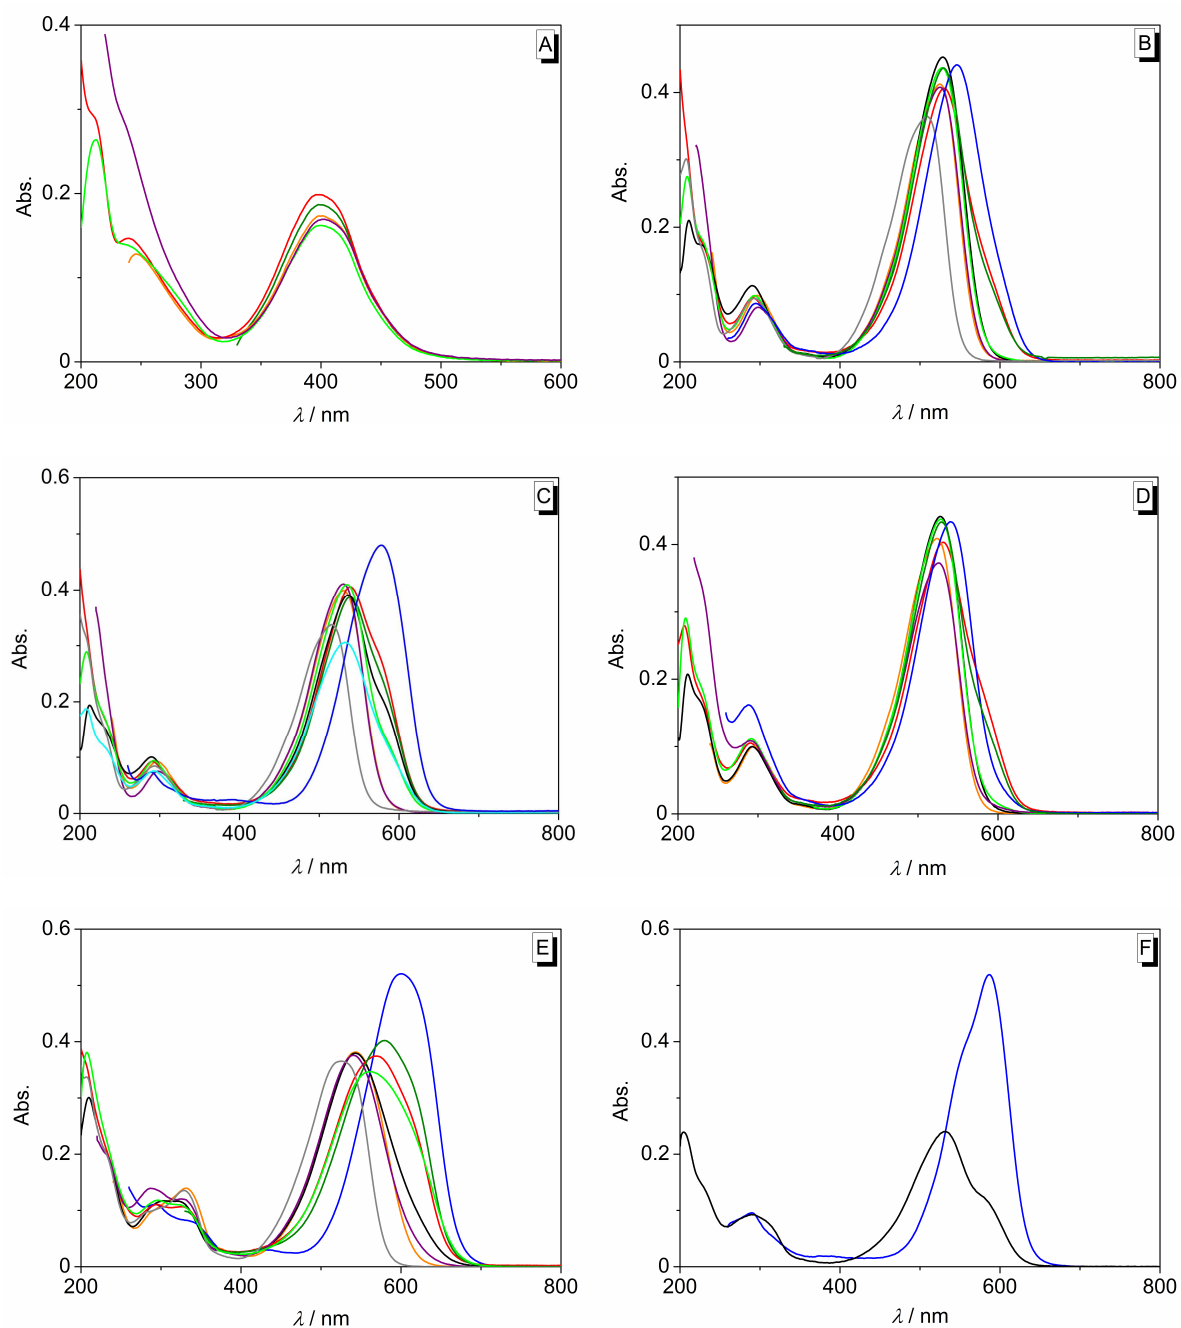

**Figure S2.** Absorption spectra of derivatives **2g** (A), **7a** (B), **7b** (C), **7c** (D), **7d** (E), **7f** (F);  $c = 10 \mu\text{M}$ ; solvents:  $\text{H}_2\text{O}$  (cyan), MeOH (black), EtOH (green), MeCN (red), DMSO (blue), acetone (olive),  $\text{CHCl}_3$  (orange), THF (purple),  $n$ -hexane (gray).

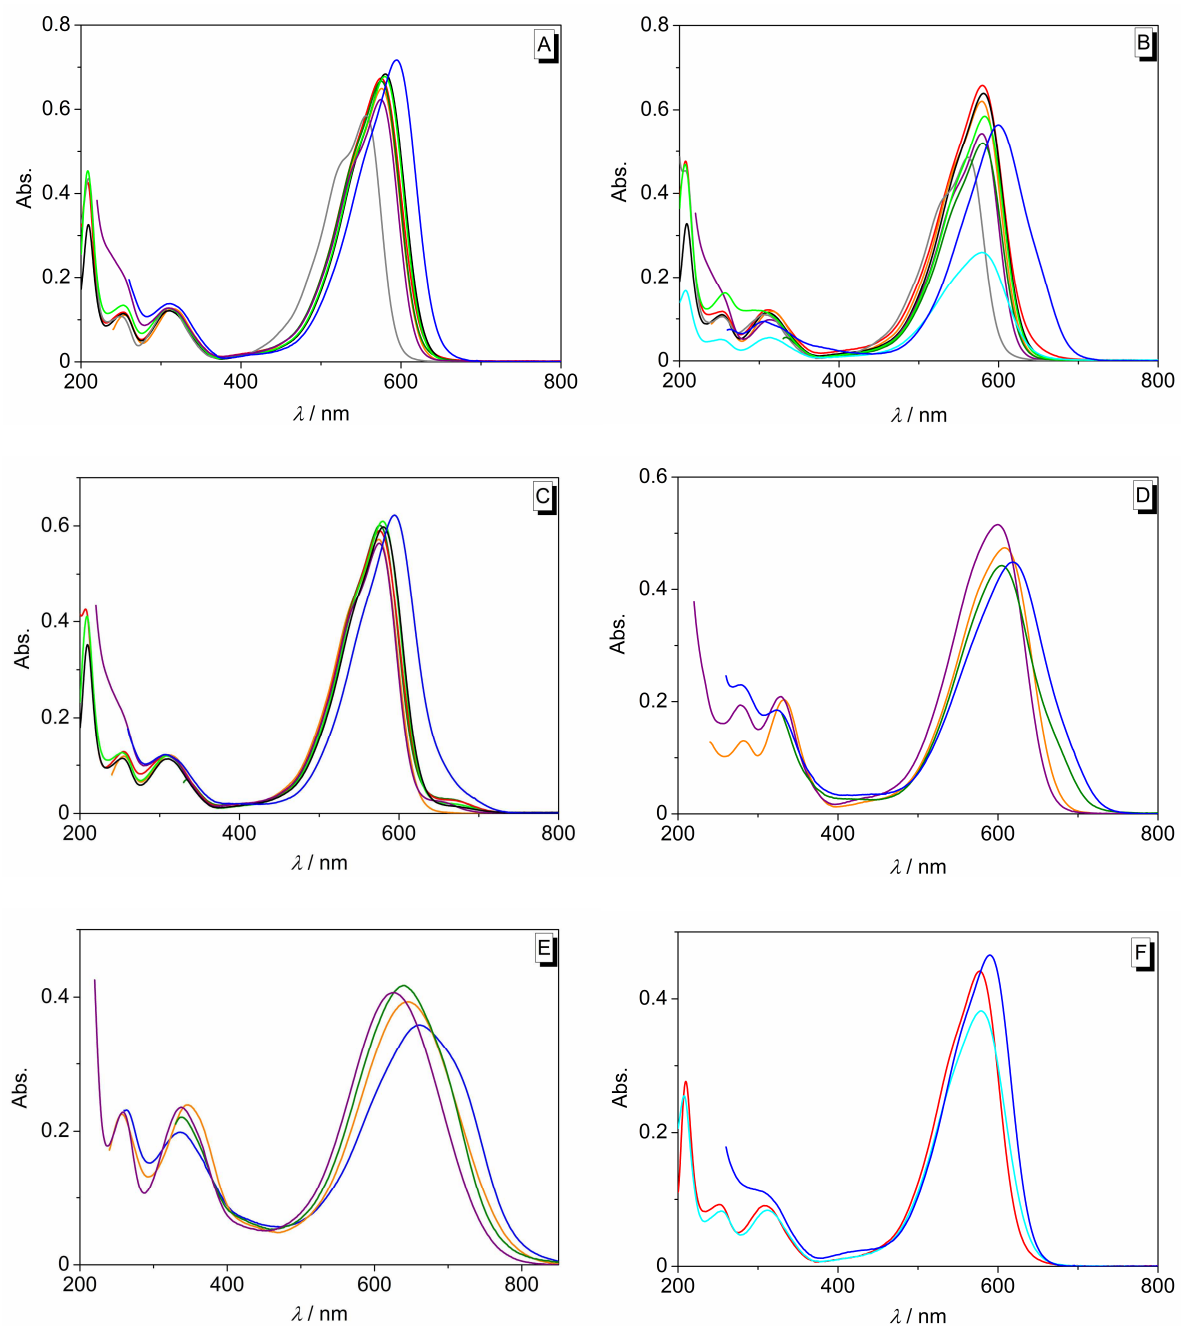

**Figure S3.** Absorption spectra of derivatives **8a** (A), **8b** (B), **8c** (C), **8d** (D), **8e** (E), **8f** (F);  $c = 10 \mu\text{M}$ ; solvents: H<sub>2</sub>O (cyan), MeOH (black), EtOH (green), MeCN (red), DMSO (blue), acetone (olive), CHCl<sub>3</sub> (orange), THF (purple), *n*-hexane (gray).

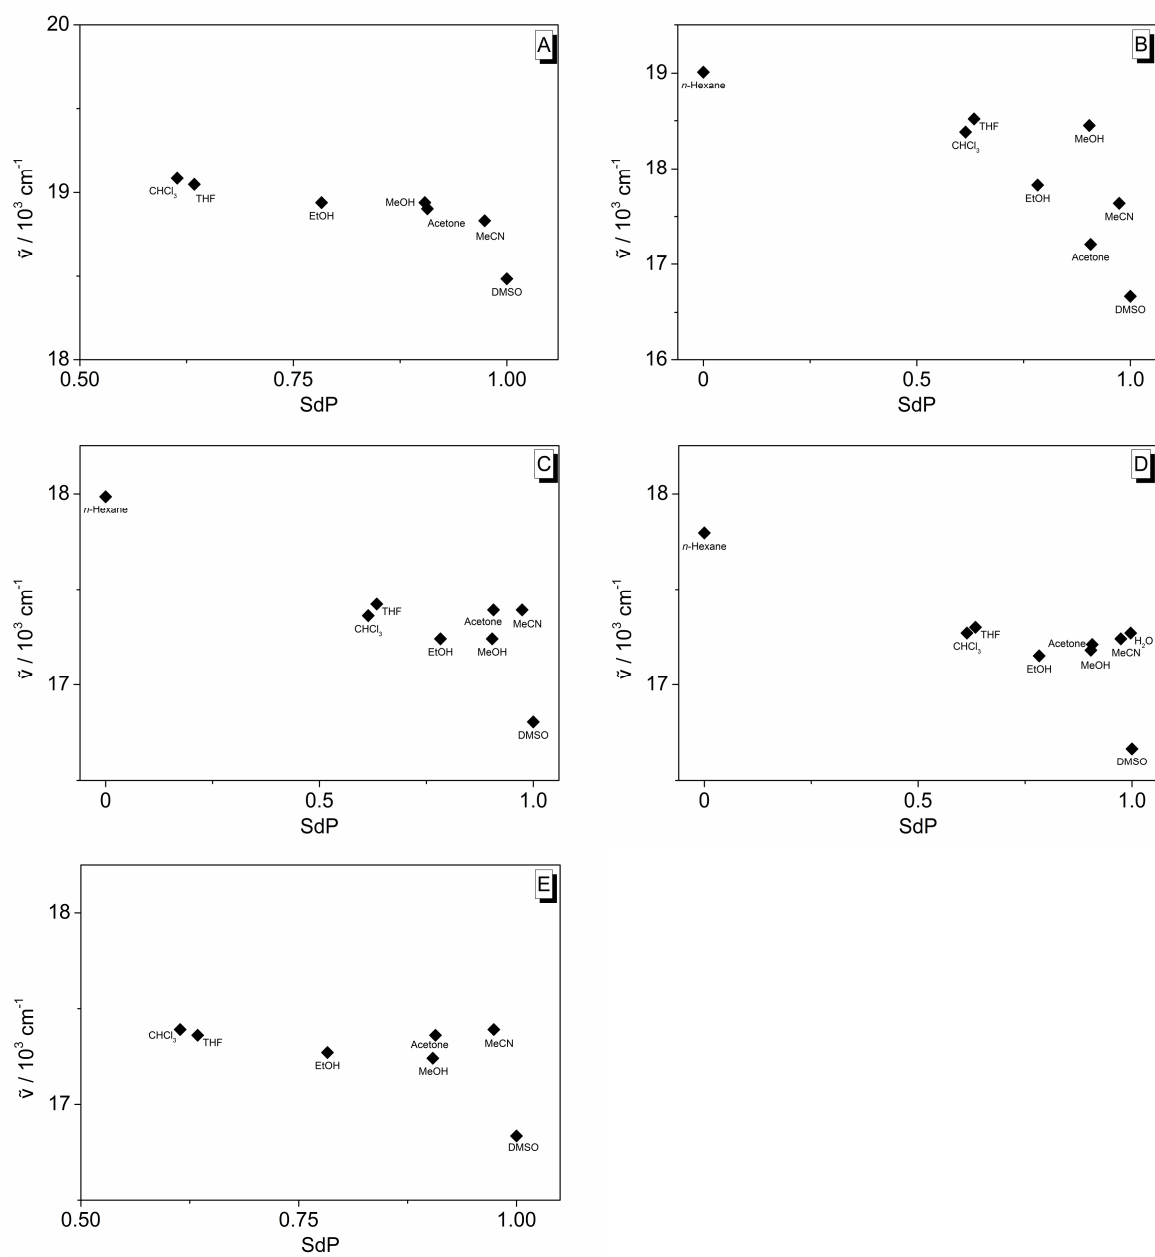

**Figure S4.** Plot of the absorption maximum of **7c** (A), **7d** (B) and **8a** (C), **8b** (D) and **8c** (E) in the respective solvents versus the dipolarity SDP.<sup>[5]</sup>

## 2.2 DNA-binding properties

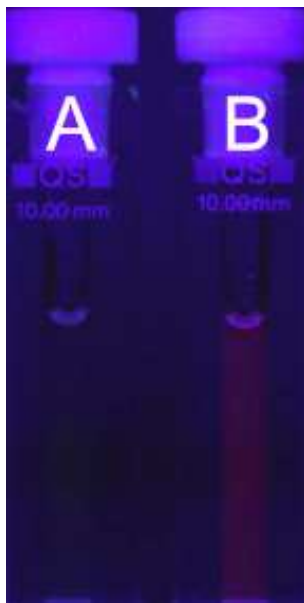

**Figure S5.** Fluorescence colors of **8b** ( $c_L = 10 \mu\text{M}$ ) in the absence (A) and in the presence (B) of ct DNA ( $c_{\text{DNA}} = 300 \mu\text{M}$ );  $\lambda_{\text{ex}} = 366 \text{ nm}$ . The contrast and brightness were enhanced by 30% without changing the true colors.

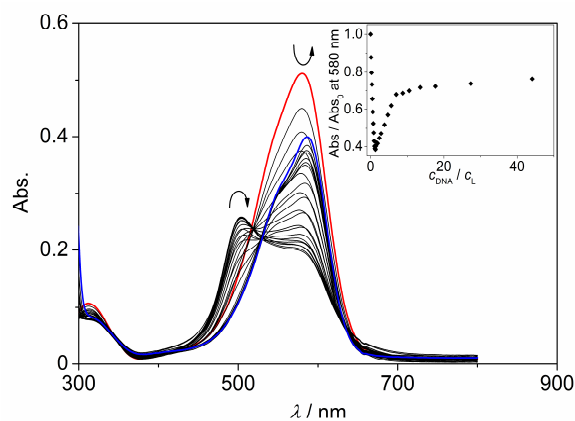

**Figure S6.** Spectrophotometric titration of **8f** with ct DNA ( $c_L = 10 \mu\text{M}$ ,  $c_{\text{DNA}} = 2.17 \text{ mM}$ ;  $c_{\text{DNA}}$  in base pairs) in BPE buffer ( $c_{\text{Na}^+} = 16 \text{ mM}$ , pH 7.0; with 5% v/v DMSO). Red: Spectrum of the pure ligand solution; blue: spectrum at the end of the titration. The arrows indicate the changes of absorption upon addition of DNA. Inset: Plot of  $\text{Abs}_e / \text{Abs}_0$  versus  $c_{\text{DNA}} / c_L$ .



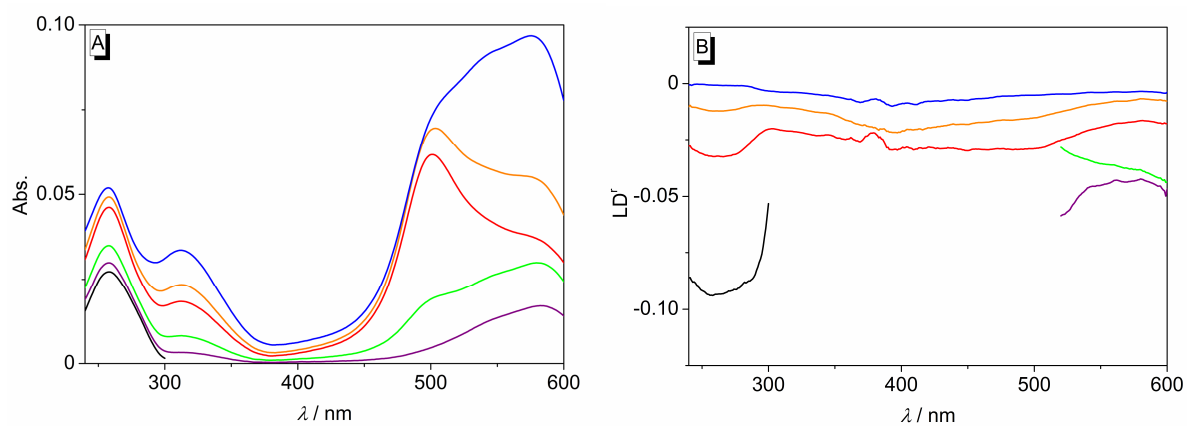

**Figure S7.** Absorption spectra ( $d = 1 \text{ mm}$ ) (A) and reduced LD spectra ( $LD^r = LD / \text{Abs}_{\text{iso}}$ ) (B) of ctDNA ( $c = 20 \mu\text{M}$ ) in the absence and presence of **8b** at LDR = 0 (black), 0.20 (purple), 0.50 (green), 1.00 (red), 1.50 (orange), 2.00 (blue) in BPE buffer ( $c_{\text{Na}^+} = 16 \text{ mM}$ , pH 7.0; with 5% v/v DMSO) (cf. Figure 4 B).

### 3 $^1\text{H}$ - and $^{13}\text{C}$ -NMR spectra

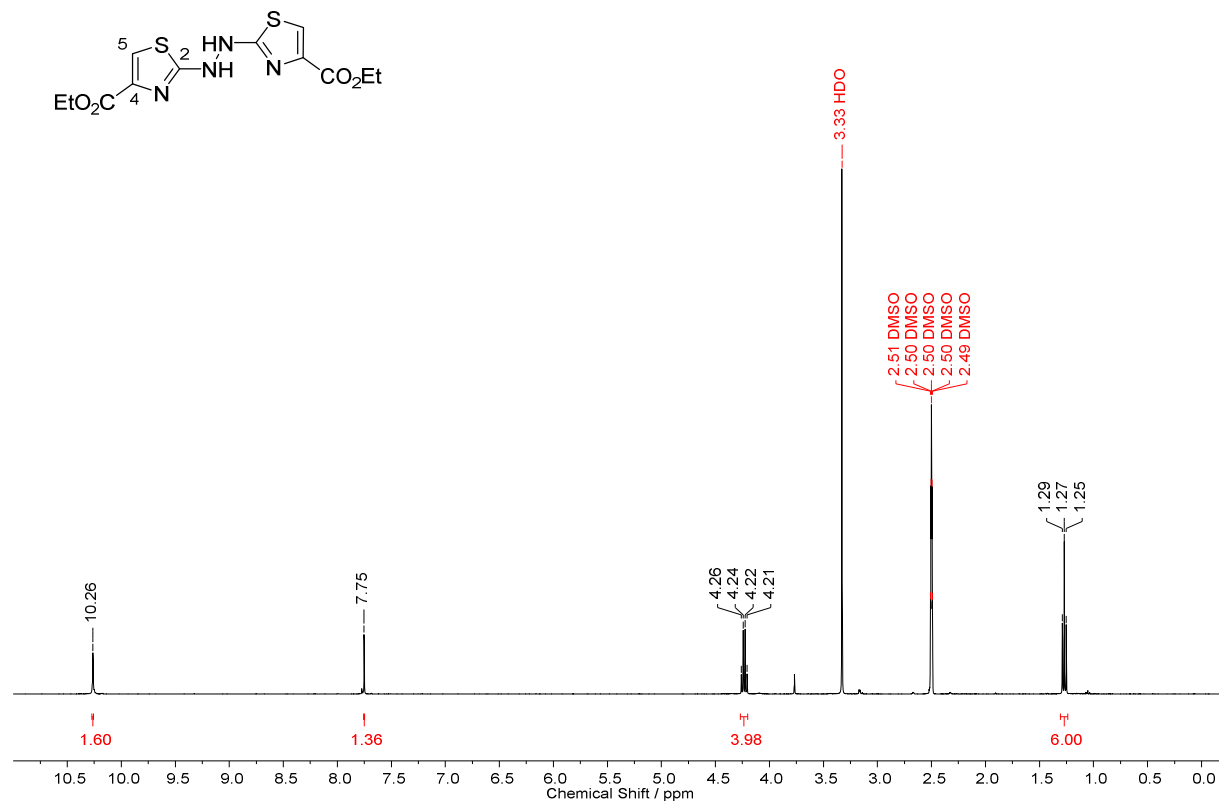

Figure S8.  $^1\text{H}$ -NMR spectrum (400 MHz) of derivative 4 in  $\text{DMSO}-d_6$ .

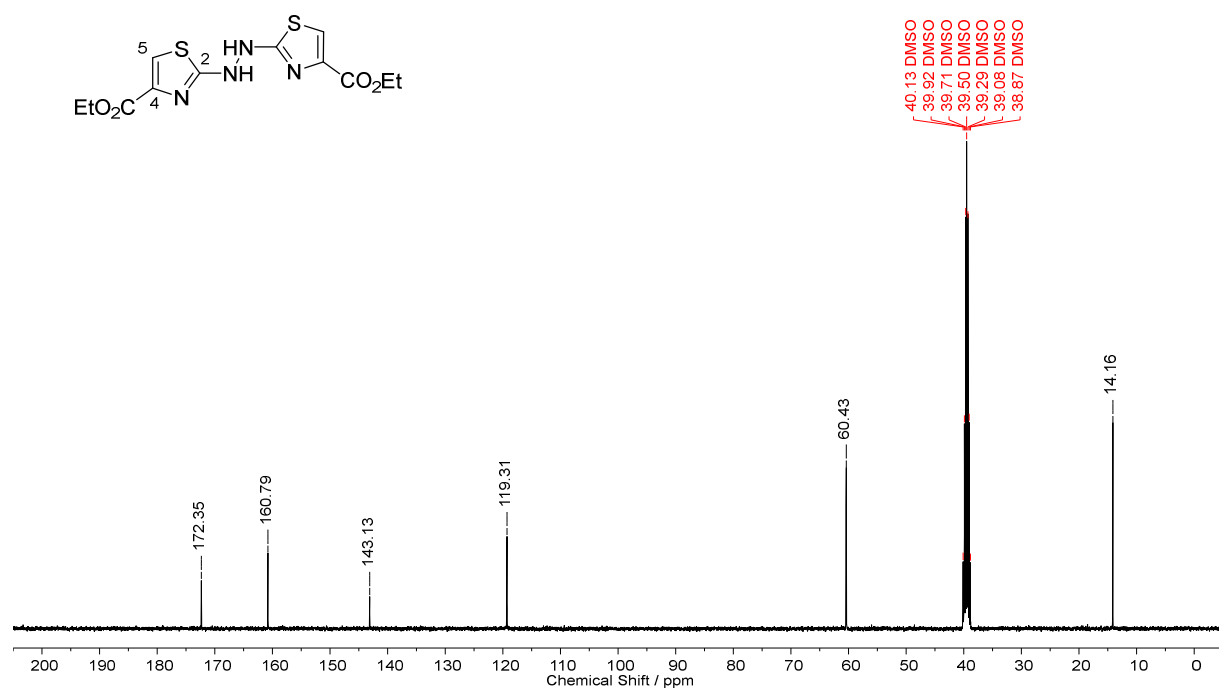

Figure S9.  $^{13}\text{C}$ -NMR spectrum (100 MHz) of derivative 4 in  $\text{DMSO}-d_6$ .

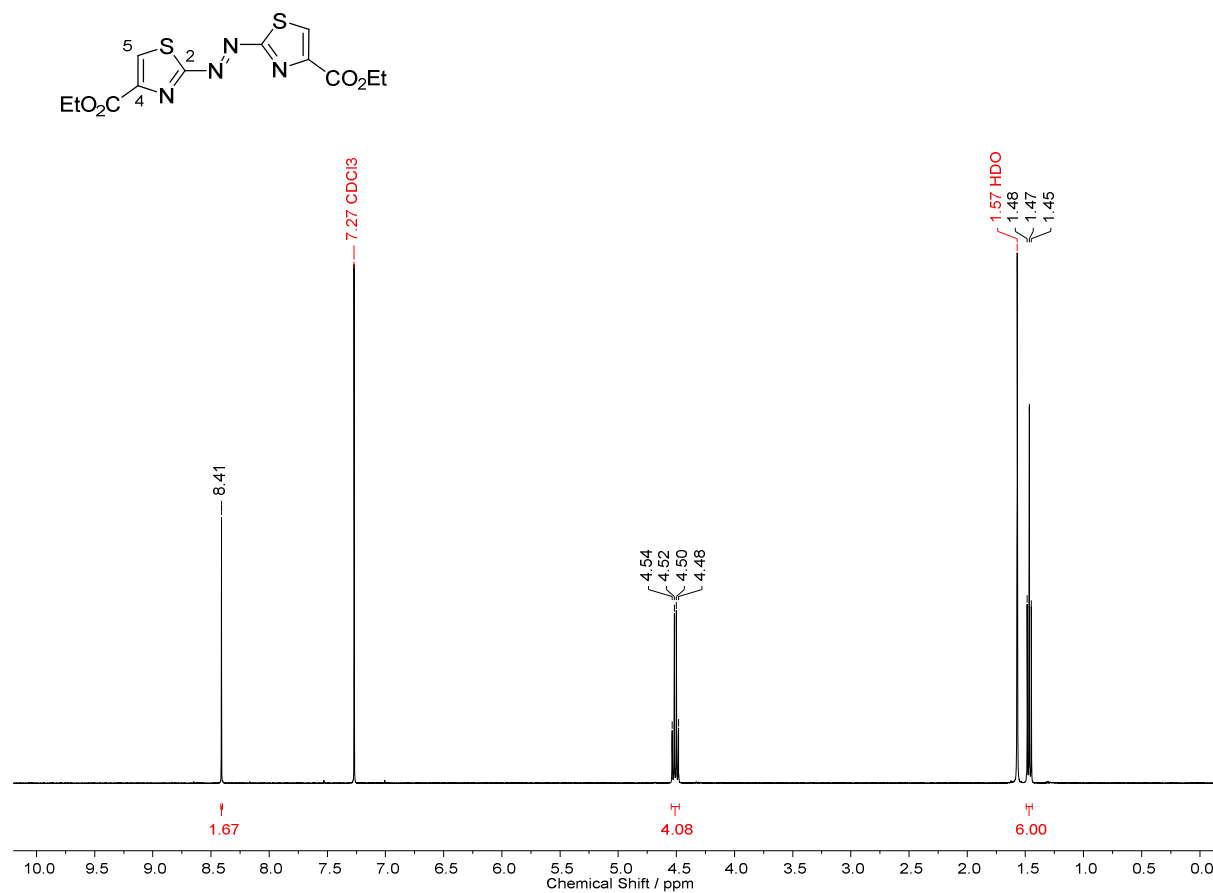

**Figure S10.** <sup>1</sup>H-NMR spectrum (400 MHz) of derivative **2g** in CDCl<sub>3</sub>.

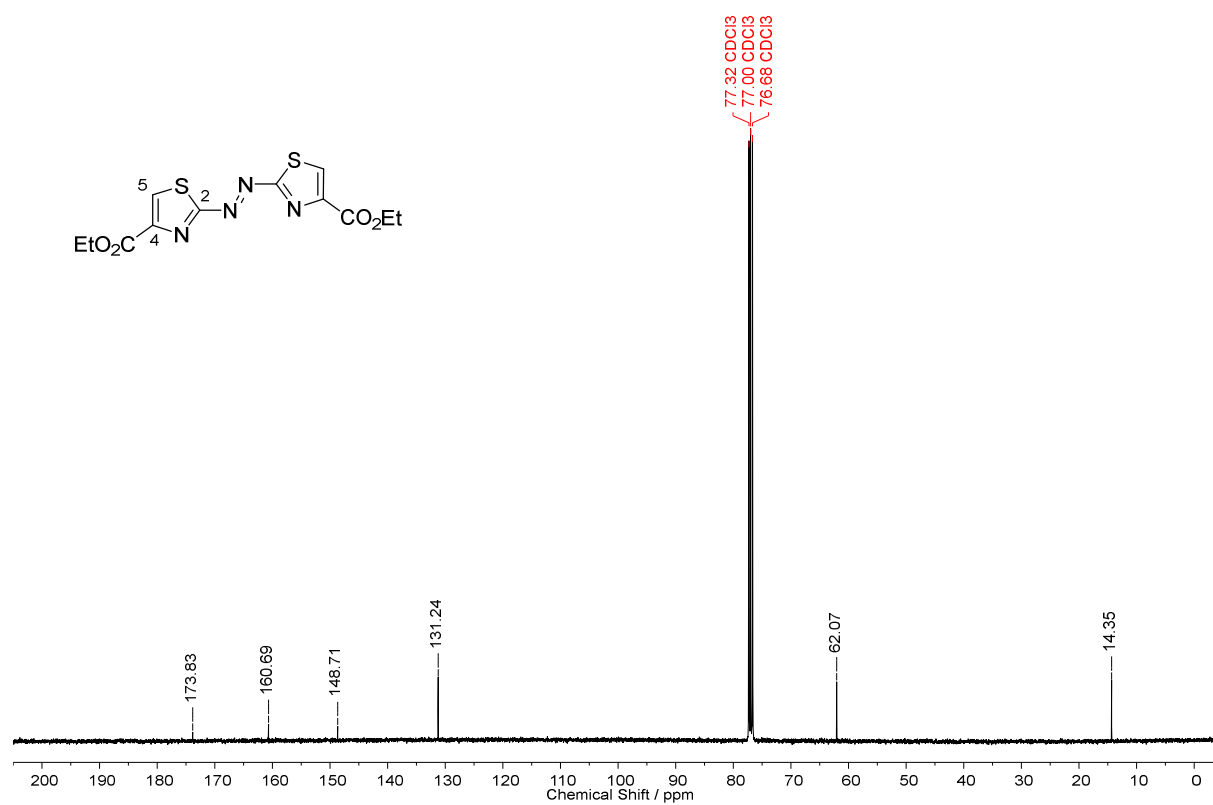

**Figure S11.** <sup>13</sup>C-NMR spectrum (100 MHz) of derivative **2g** in CDCl<sub>3</sub>.

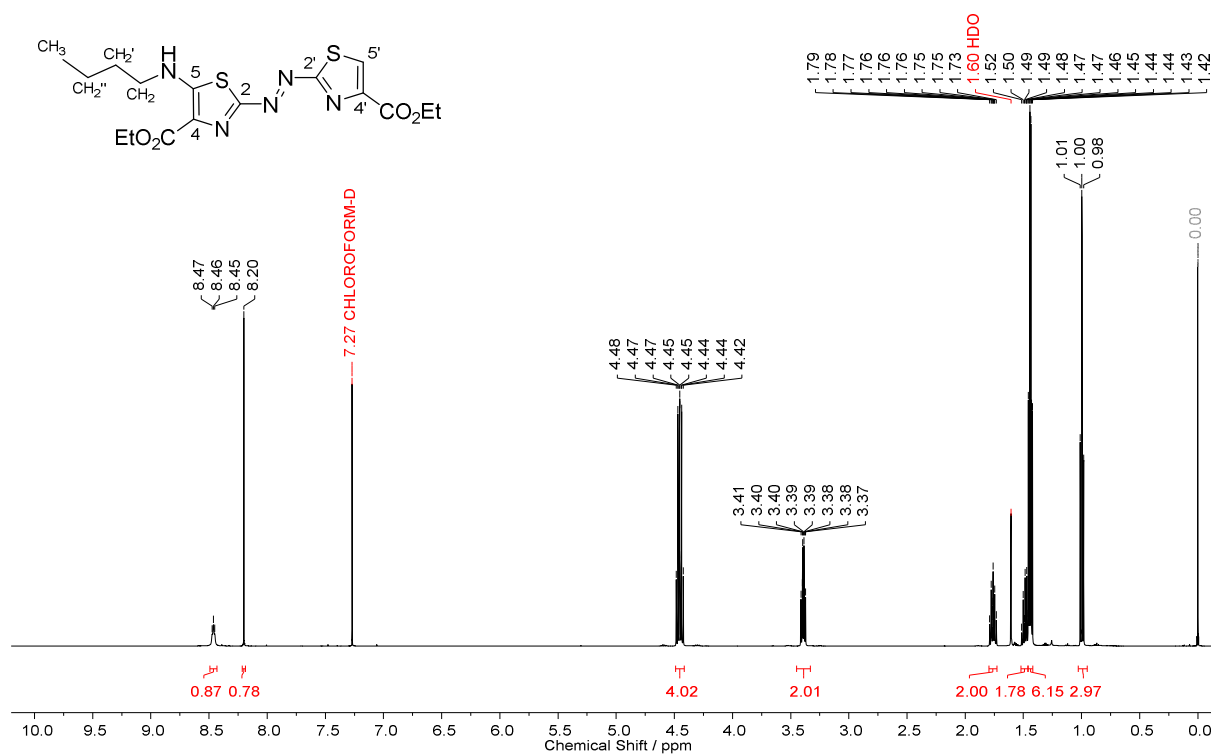

Figure S12.  $^1\text{H-NMR}$  spectrum (500 MHz) of derivative **7a** in  $\text{CDCl}_3$ .

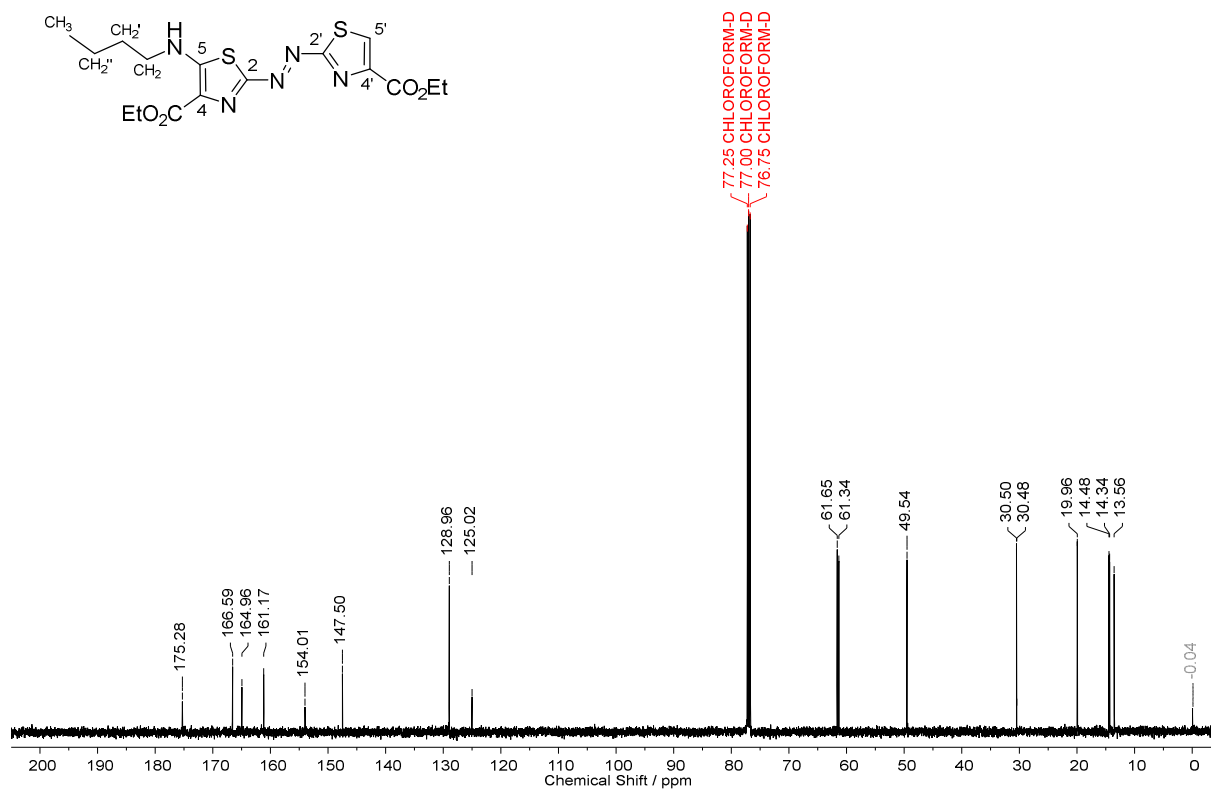

Figure S13.  $^{13}\text{C-NMR}$  spectrum (125 MHz) of derivative **7a** in  $\text{CDCl}_3$ .

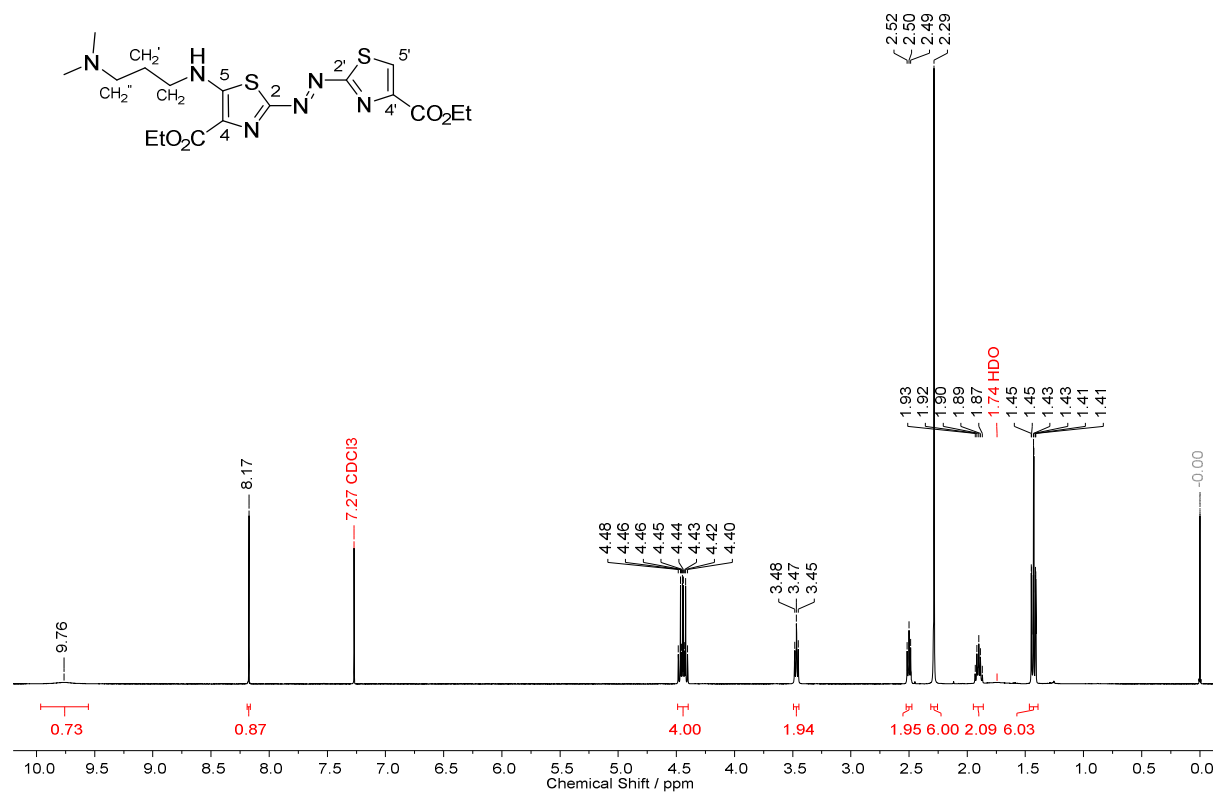

**Figure S14.**  $^1\text{H-NMR}$  spectrum (400 MHz) of derivative **7b** in  $\text{CDCl}_3$ .

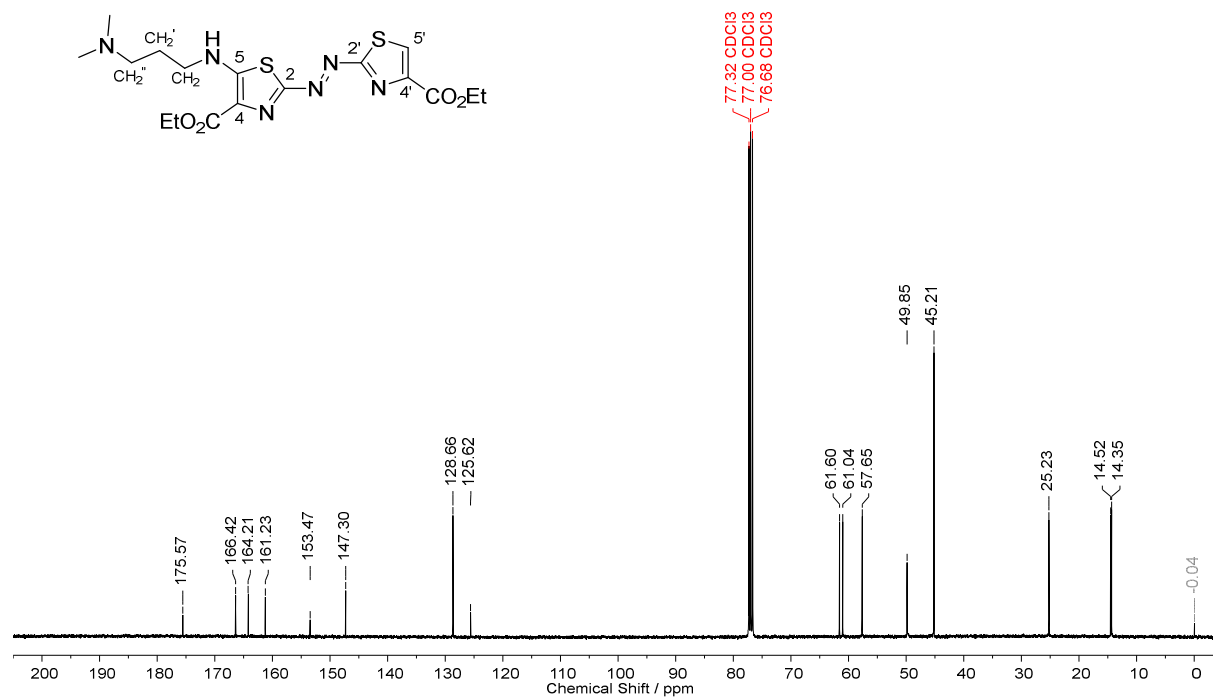

**Figure S15.**  $^{13}\text{C-NMR}$  spectrum (100 MHz) of derivative **7b** in  $\text{CDCl}_3$ .

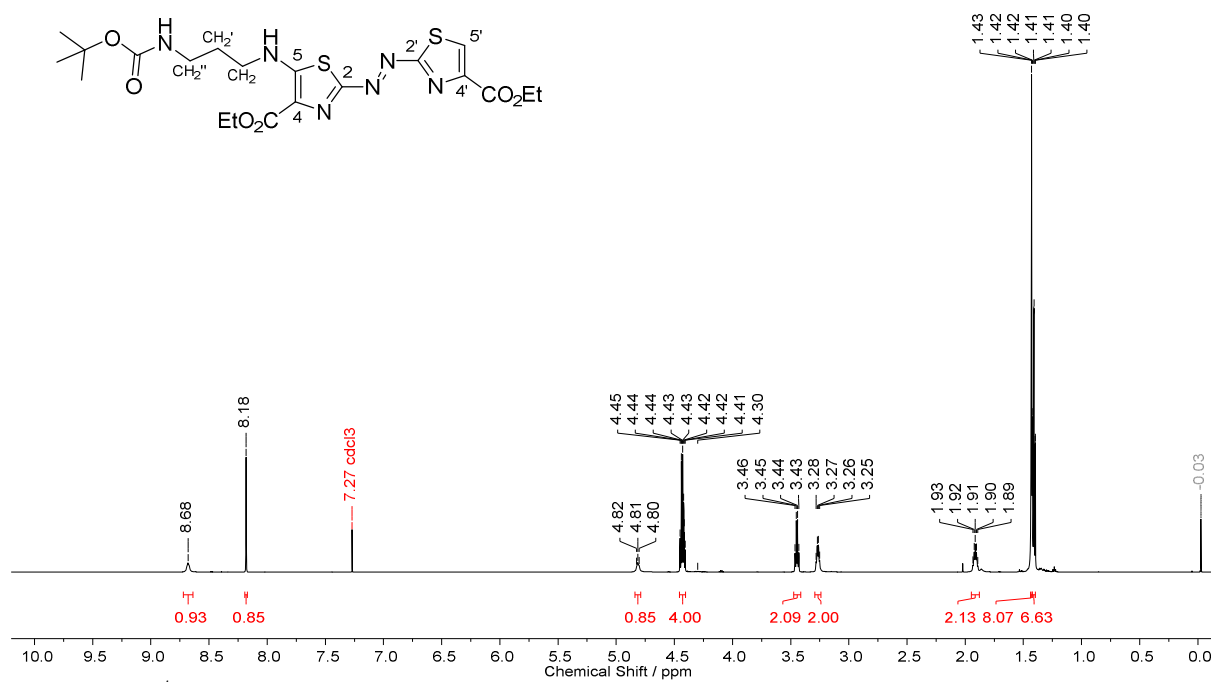

Figure S16. <sup>1</sup>H-NMR spectrum (600 MHz) of derivative **7c** in CDCl<sub>3</sub>.

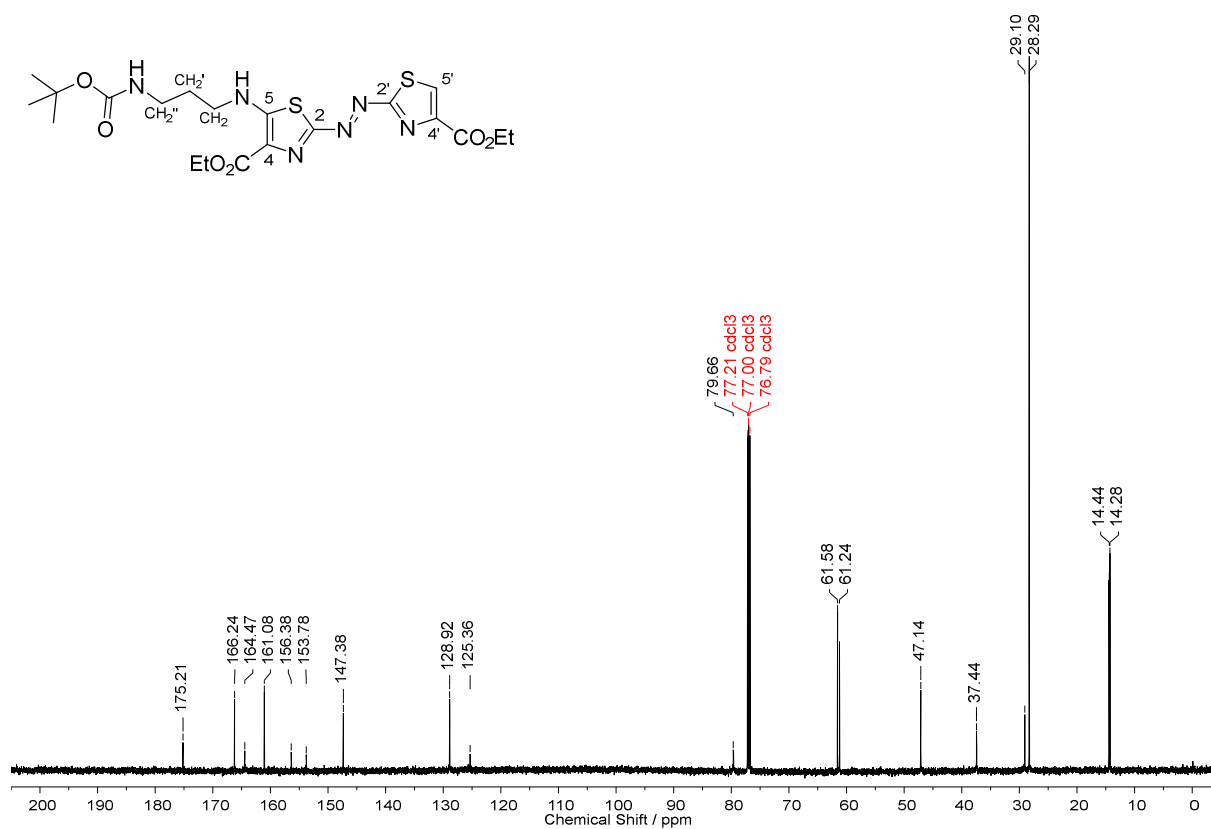

Figure S17. <sup>13</sup>C-NMR spectrum (150 MHz) of derivative **7c** in CDCl<sub>3</sub>.

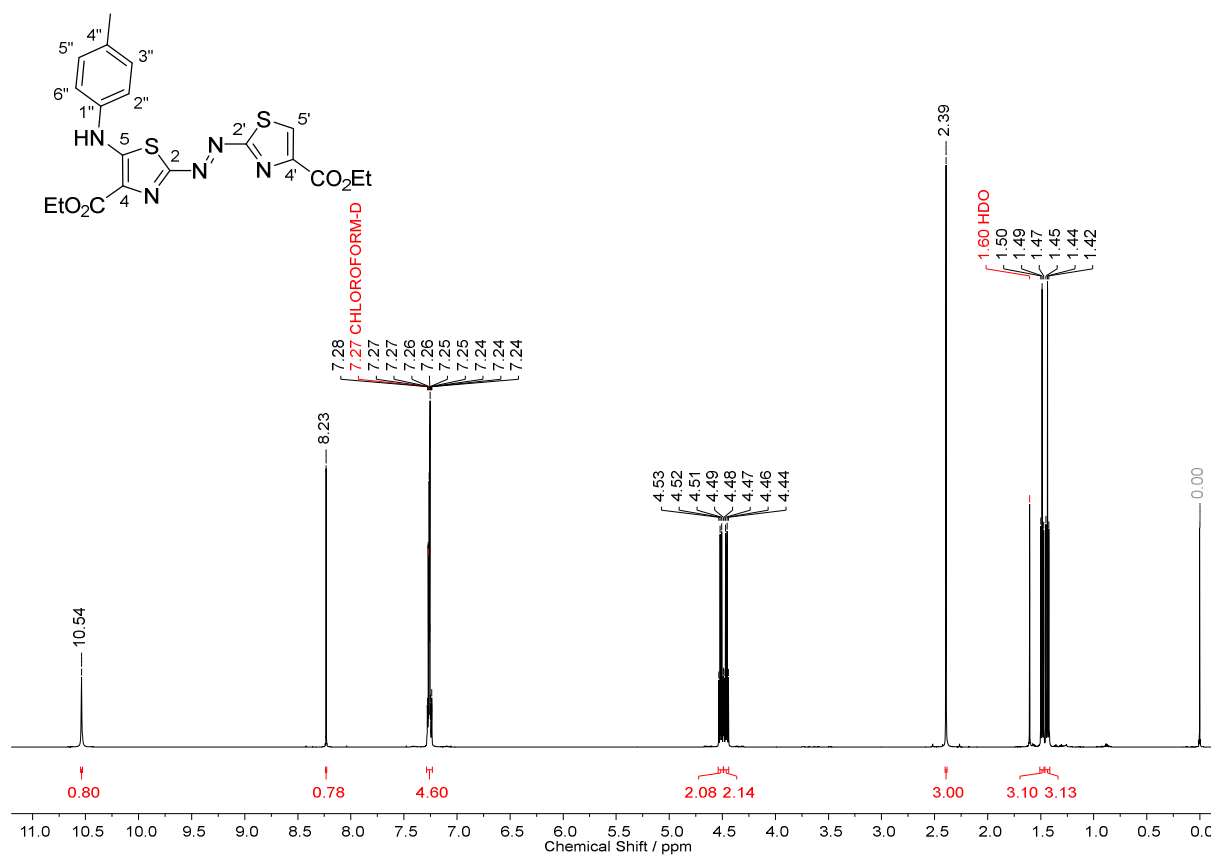

Figure S18. <sup>1</sup>H-NMR spectrum (500 MHz) of derivative **7d** in CDCl<sub>3</sub>.

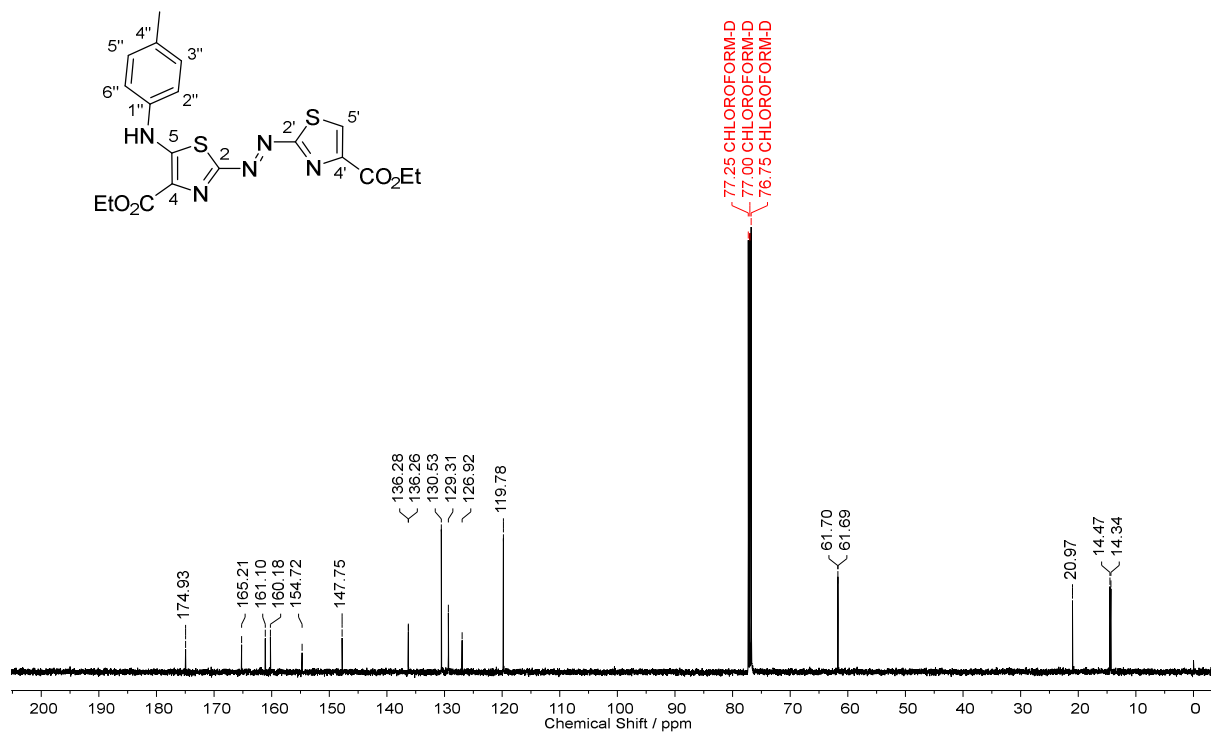

Figure S19. <sup>13</sup>C-NMR spectrum (125 MHz) of derivative **7d** in CDCl<sub>3</sub>.

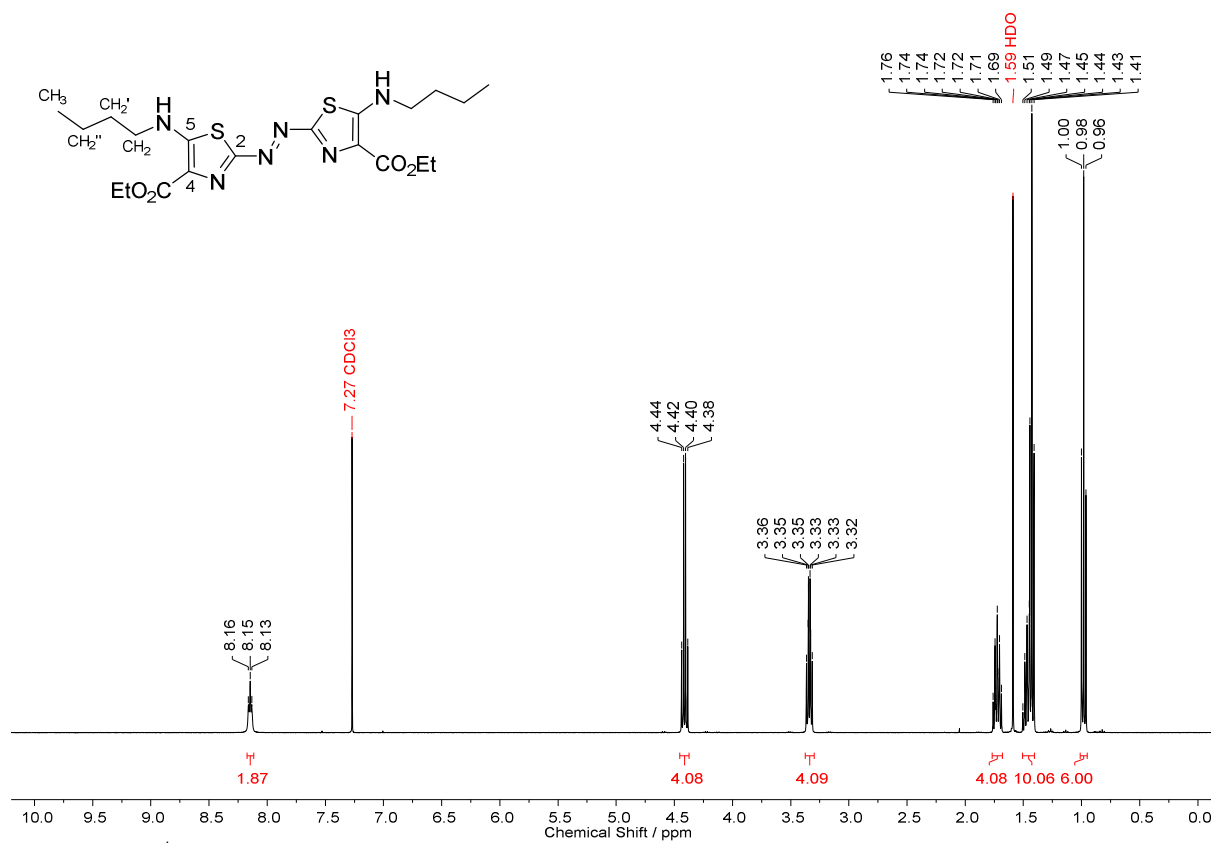

Figure S20. <sup>1</sup>H-NMR spectrum (400 MHz) of derivative **8a** in CDCl<sub>3</sub>.

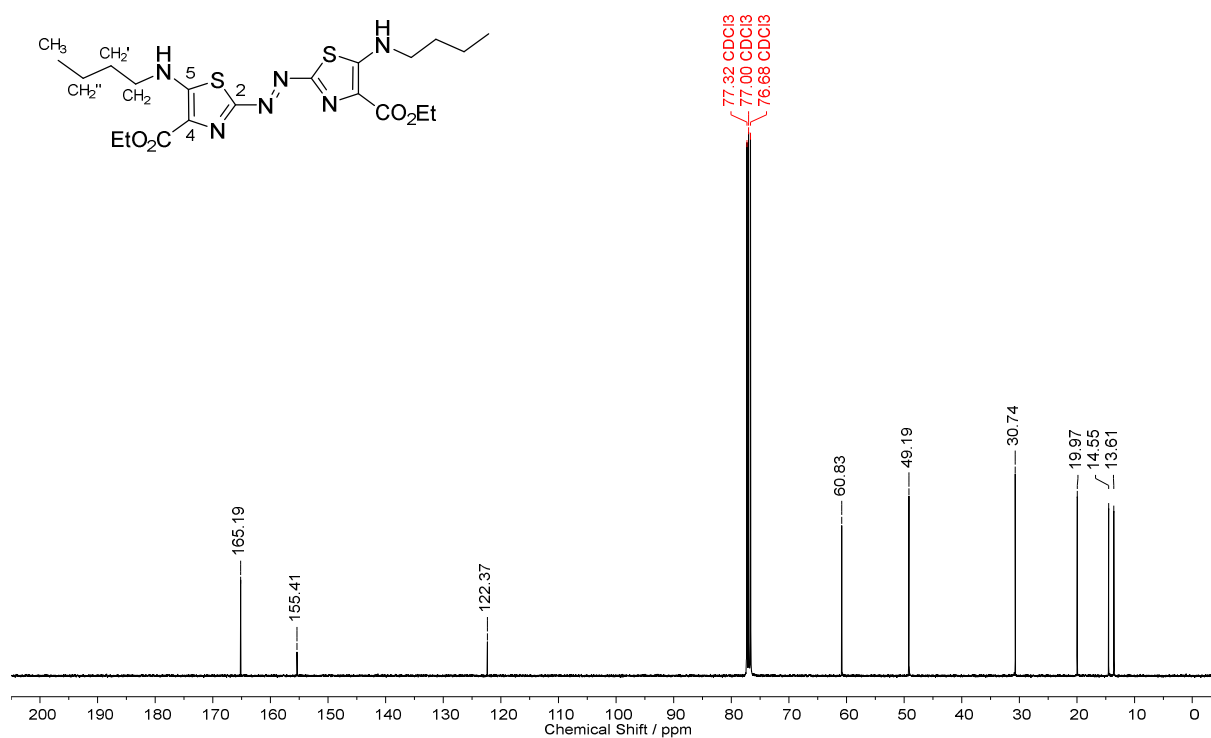

Figure S21. <sup>13</sup>C-NMR spectrum (100 MHz) of derivative **8a** in CDCl<sub>3</sub>.



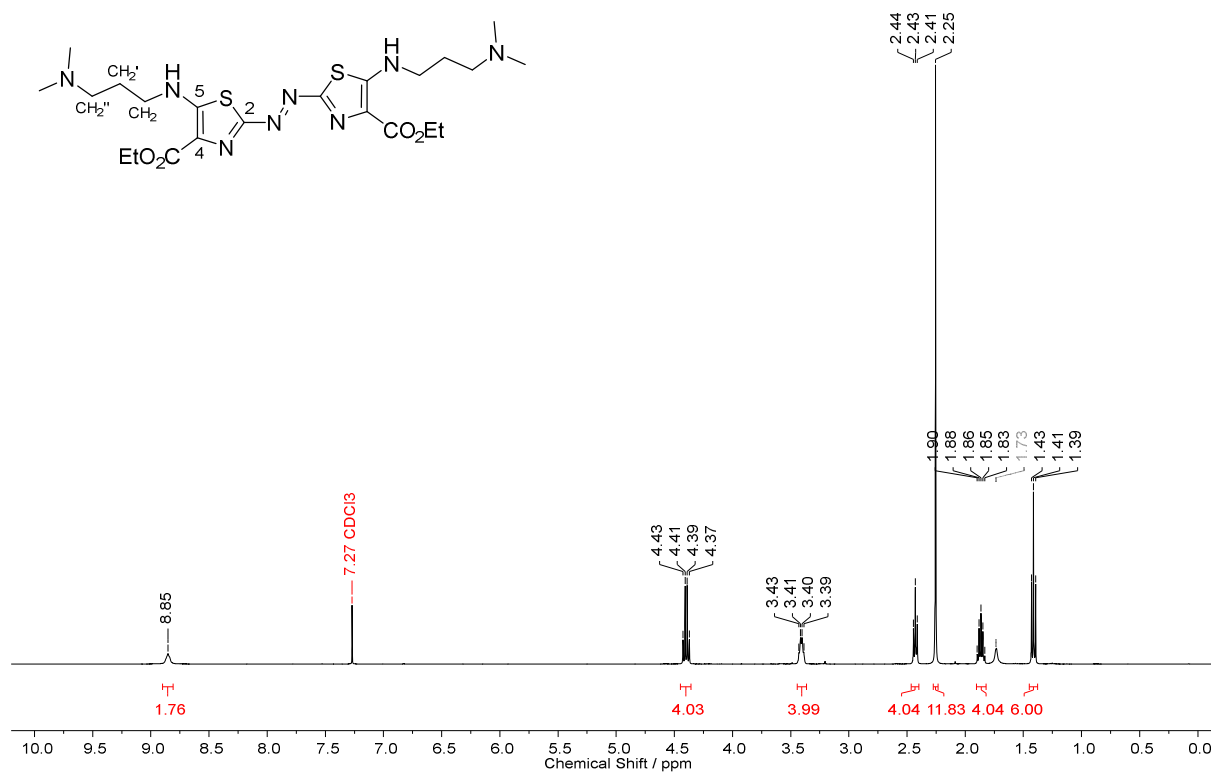

Figure S22. <sup>1</sup>H-NMR spectrum (400 MHz) of derivative **8b** in CDCl<sub>3</sub>.

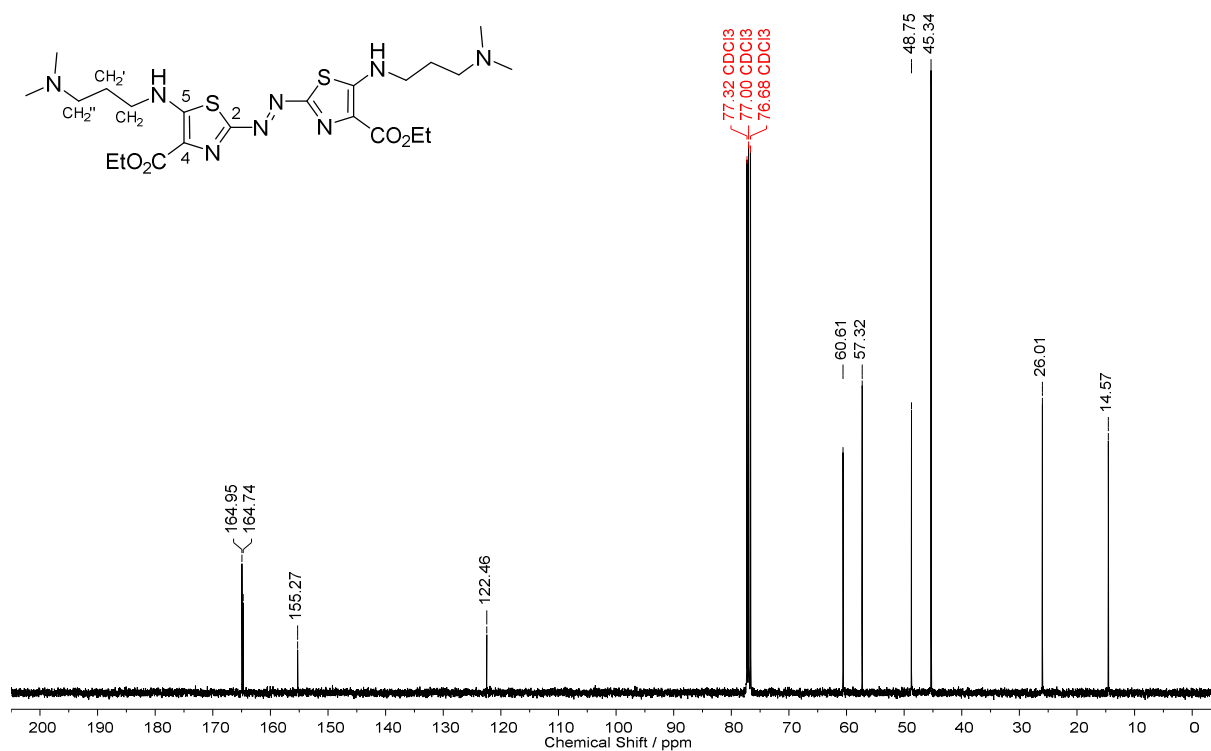

Figure S23. <sup>13</sup>C-NMR spectrum (100 MHz) of derivative **8b** in CDCl<sub>3</sub>.

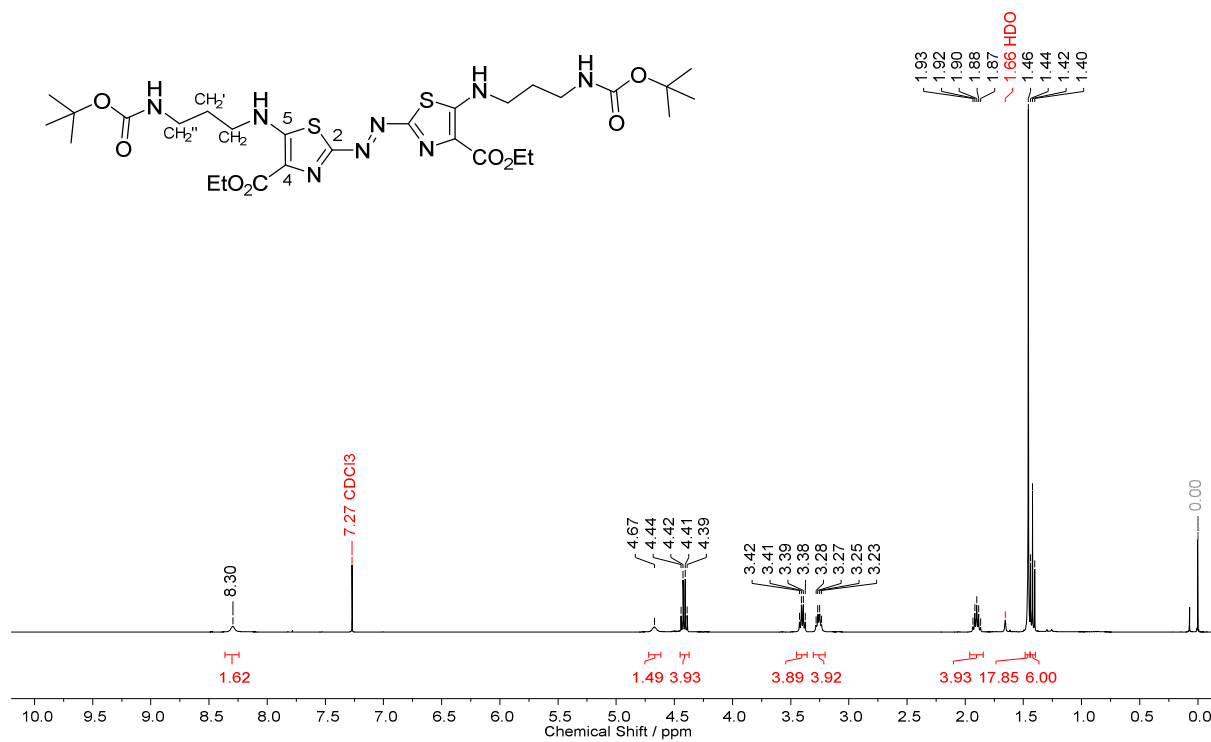

Figure S24. <sup>1</sup>H-NMR spectrum (400 MHz) of derivative **8c** in CDCl<sub>3</sub>.

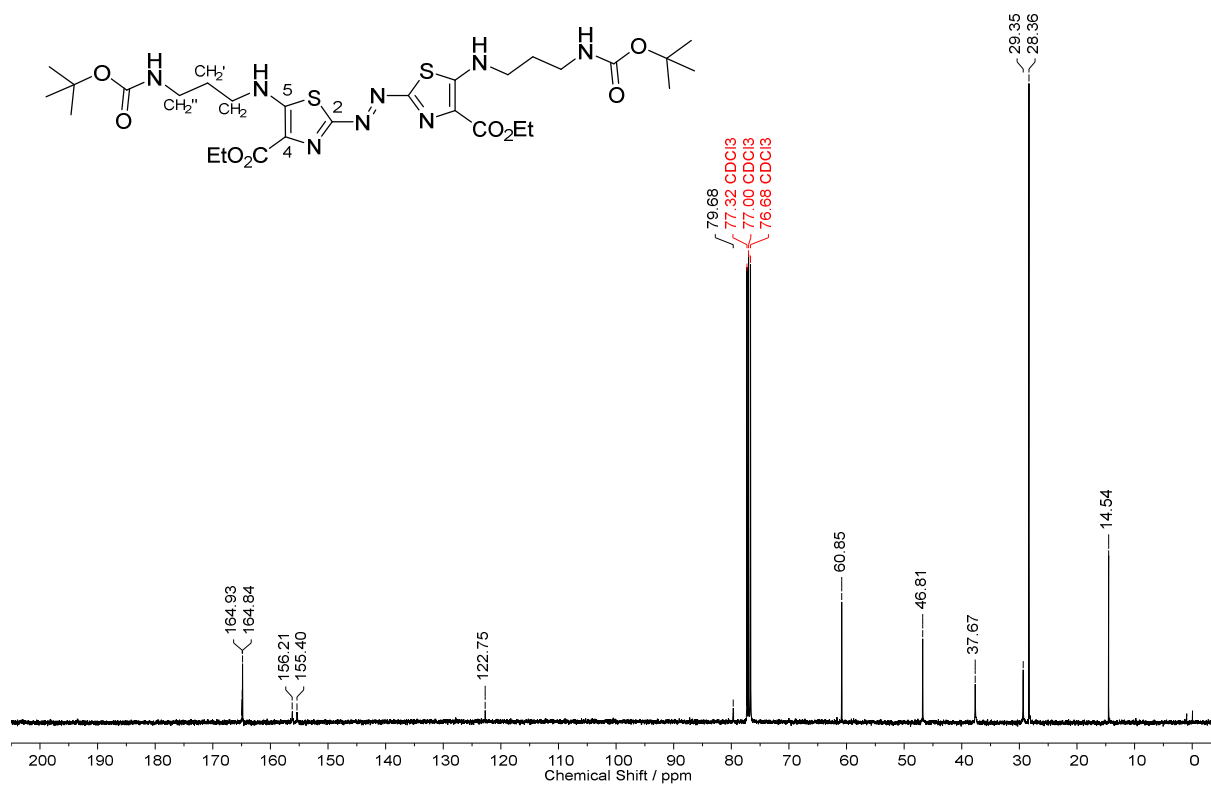

Figure S25. <sup>13</sup>C-NMR spectrum (100 MHz) of derivative **8c** in CDCl<sub>3</sub>.

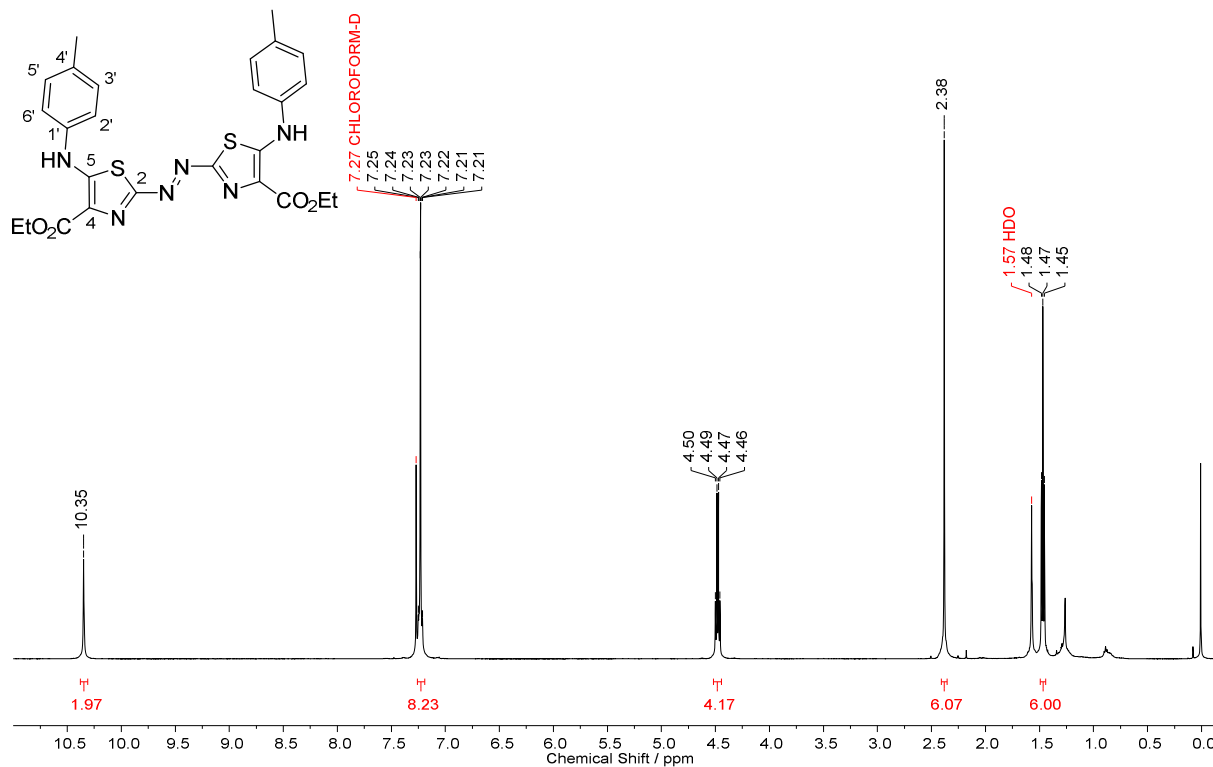

**Figure S26.**  $^1\text{H-NMR}$  spectrum (500 MHz) of derivative **8d** in  $\text{CDCl}_3$ .

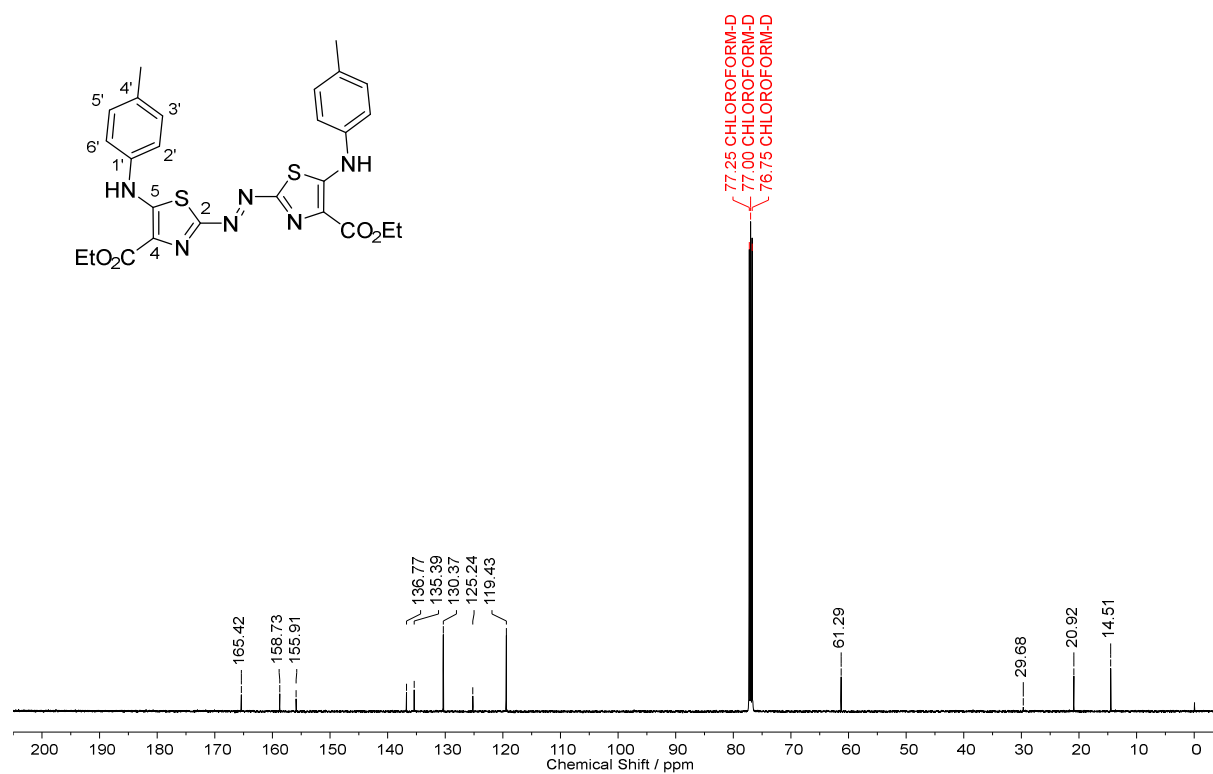

**Figure S27.**  $^{13}\text{C-NMR}$  spectrum (125 MHz) of derivative **8d** in  $\text{CDCl}_3$ .

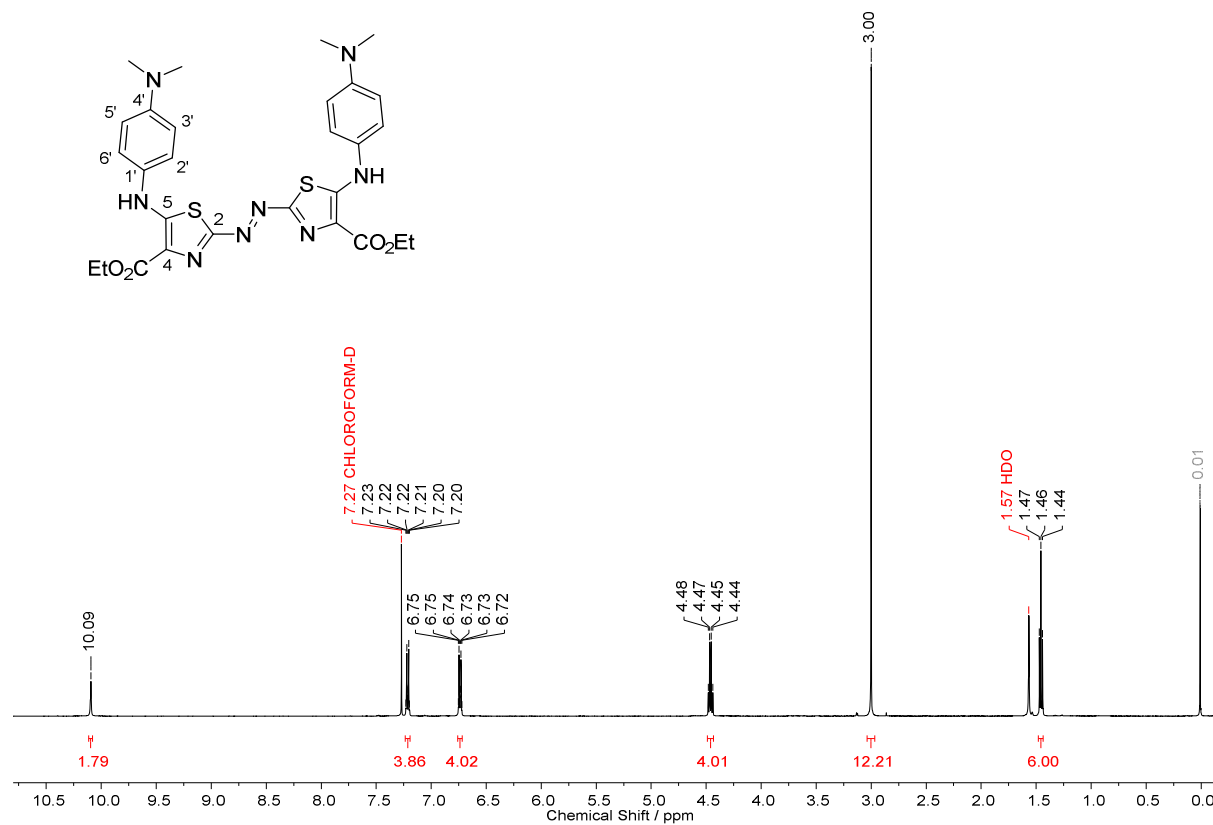

**Figure S28.**  $^1\text{H-NMR}$  spectrum (500 MHz) of derivative **8e** in  $\text{CDCl}_3$ .

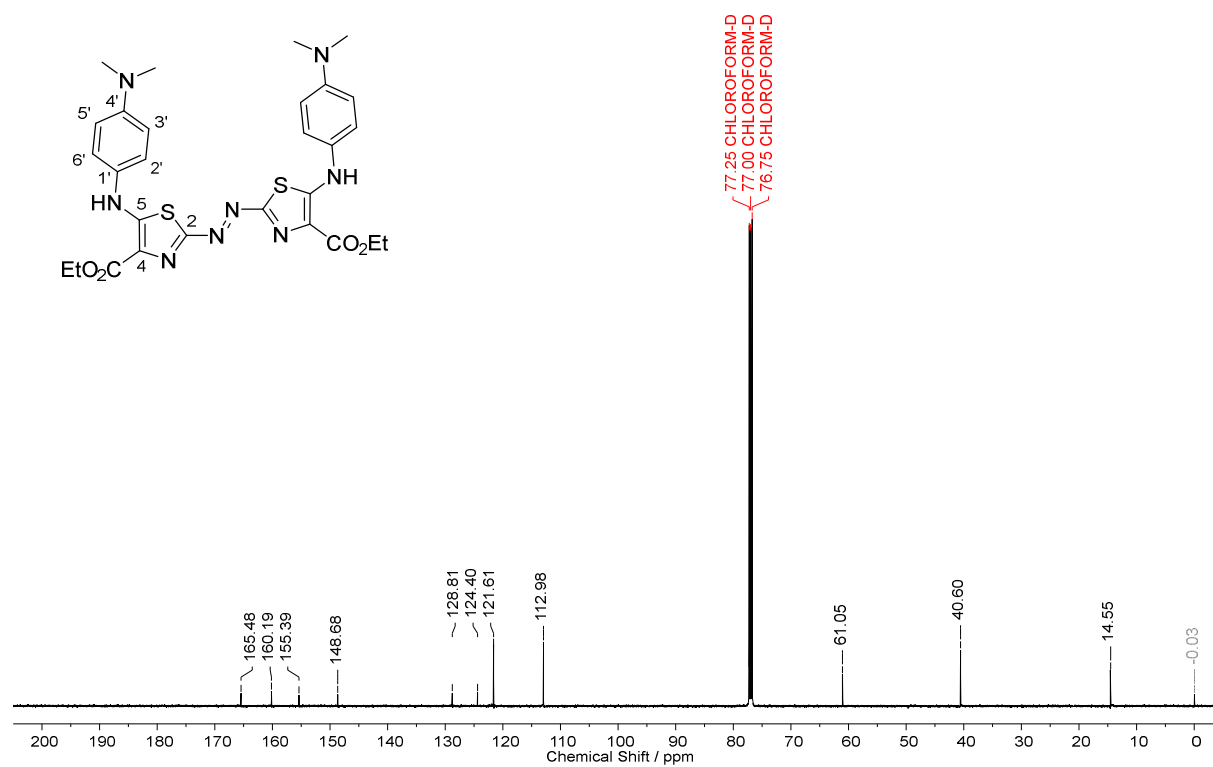

**Figure S29.**  $^{13}\text{C-NMR}$  spectrum (125 MHz) of derivative **8e** in  $\text{CDCl}_3$ .

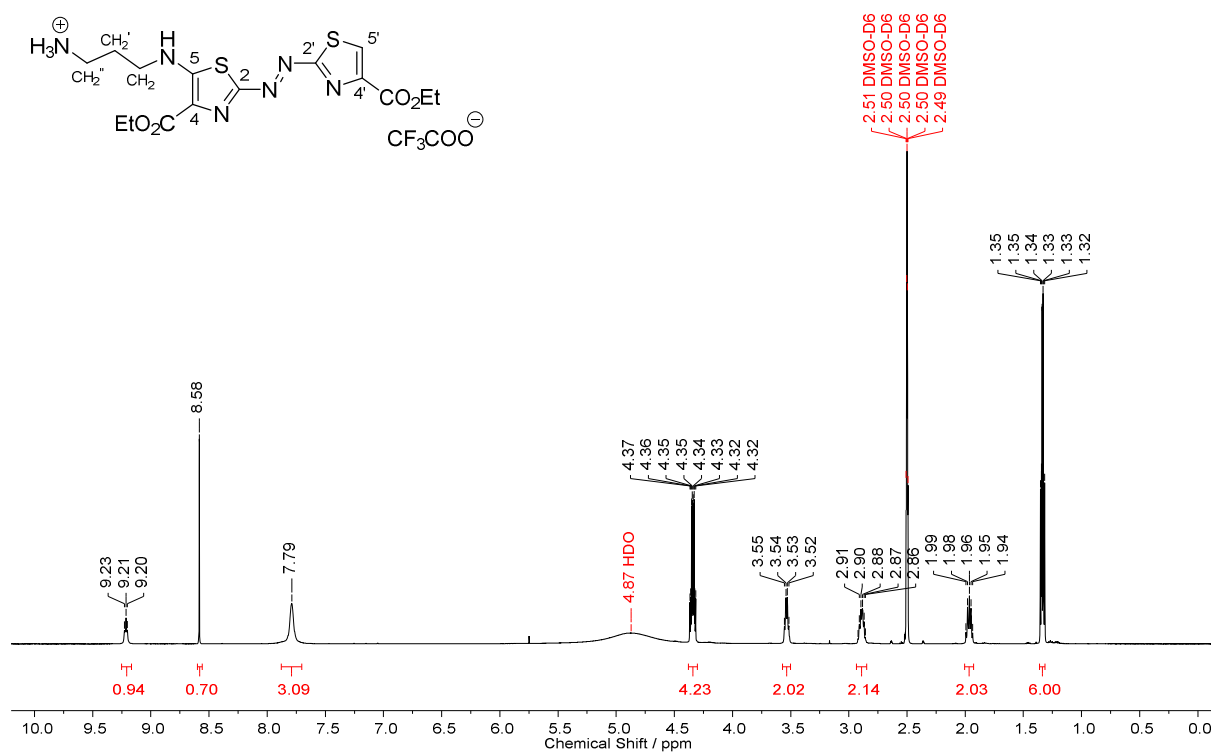

Figure S30. <sup>1</sup>H-NMR spectrum (500 MHz) of derivative **7f** in DMSO-*d*<sub>6</sub>.

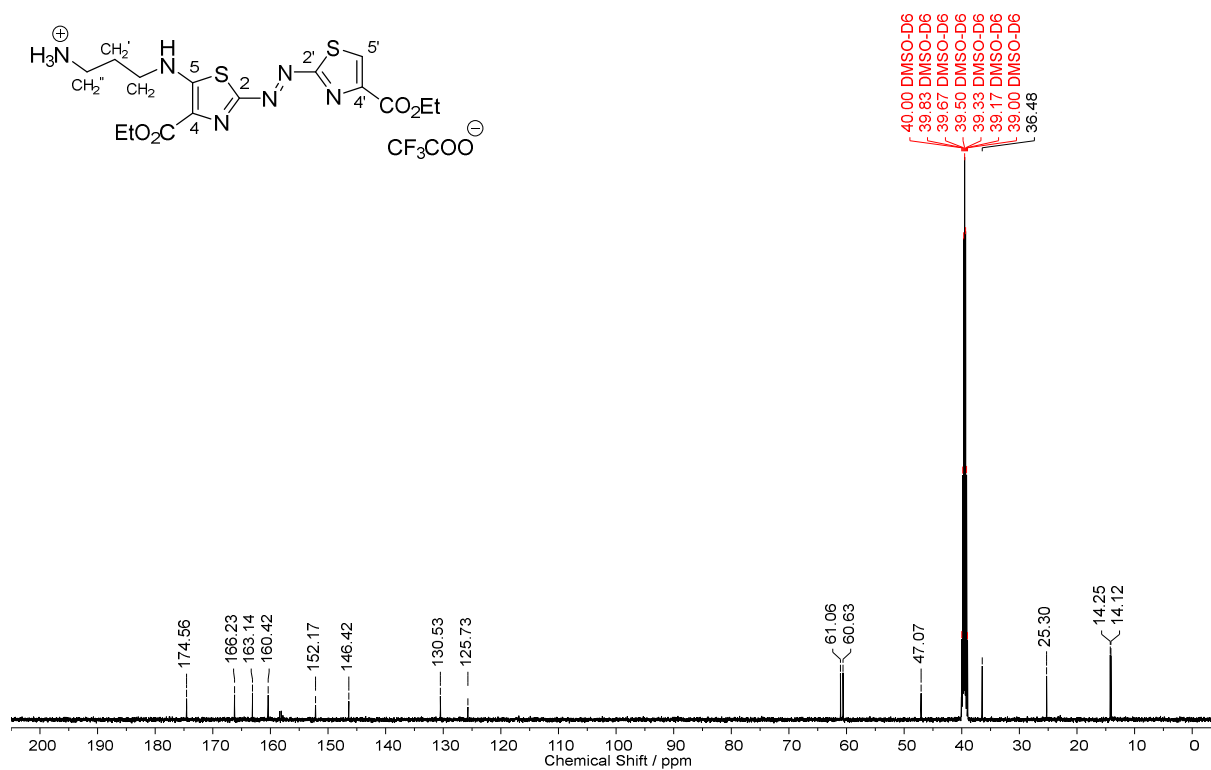

Figure S31. <sup>13</sup>C-NMR spectrum (125 MHz) of derivative **7f** in DMSO-*d*<sub>6</sub>.

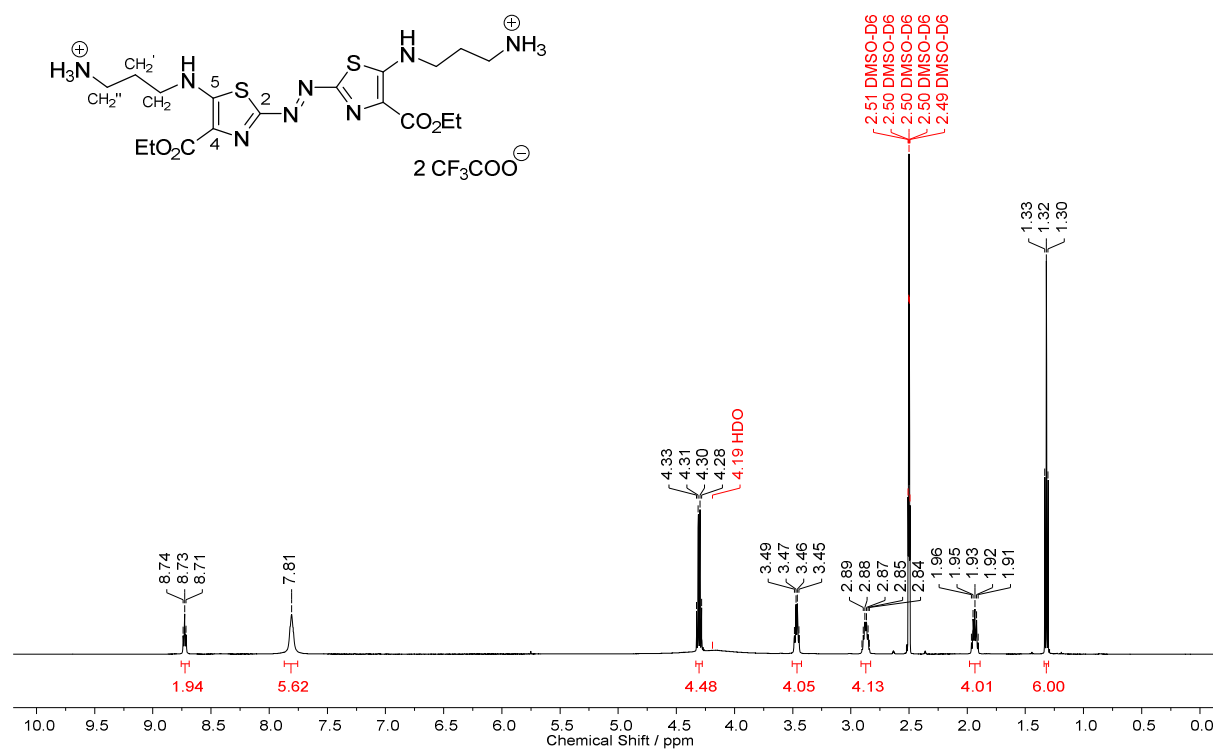

Figure S32. <sup>1</sup>H-NMR spectrum (500 MHz) of derivative **8f** in DMSO-*d*<sub>6</sub>.

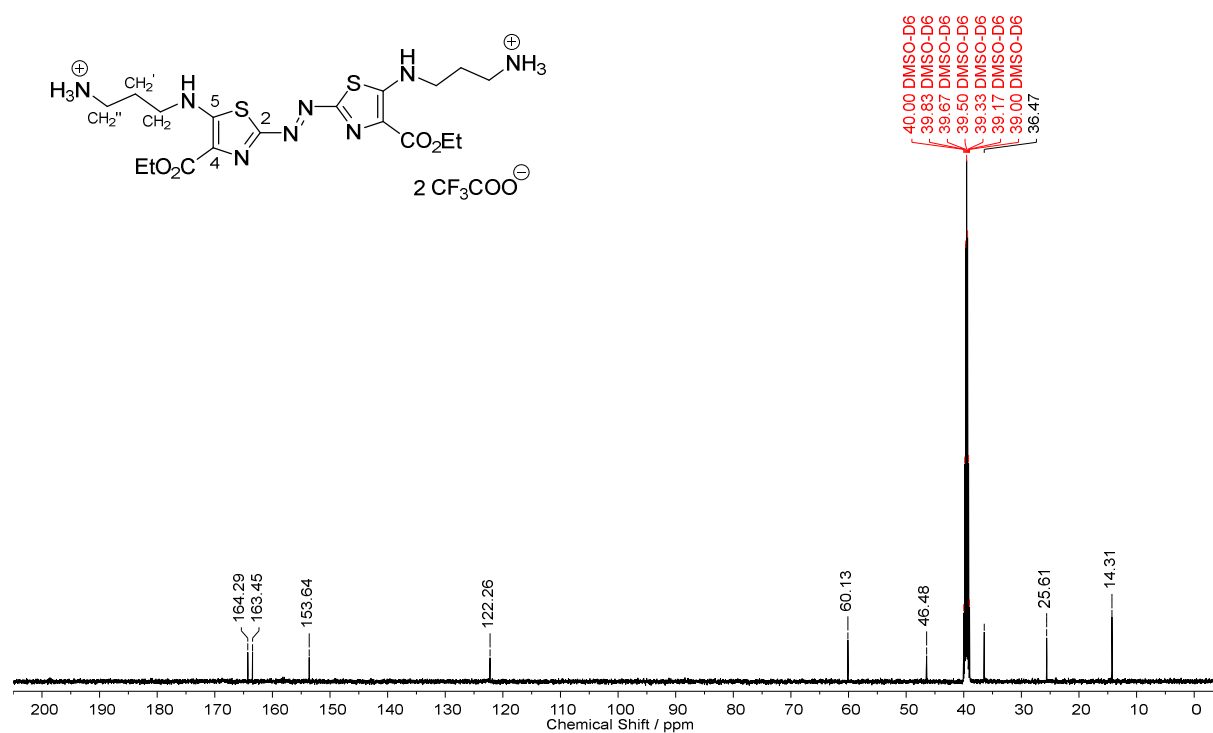

Figure S33. <sup>13</sup>C-NMR spectrum (125 MHz) of derivative **8f** in DMSO-*d*<sub>6</sub>.

## 4 References

- [1] D. Magde, J. H. Brannon, T. L. Creemers, J. Olmsted, *J. Phys. Chem.* **1979**, *83*, 696–699.
- [2] a) G. A. Crosby, J. N. Demas, *J. Phys. Chem.* **1971**, *75*, 991–1024; b) B. Valeur, M. N. Berberan-Santos, *Molecular Fluorescence. Principles and Applications*, Wiley-VCH, Weinheim, **2012**.
- [3] H. Beyer, A. Kreuzberger, *Chem. Ber.* **1951**, *84*, 482–485.
- [4] D. Muller, I. Zeltser, G. Bitan, C. Gilon, *J. Org. Chem.* **1997**, *62*, 411–416.
- [5] J. Catalán, *J. Phys. Chem. B* **2009**, *113*, 5951–5960.
